# Supplementary material for: Synthesis of the diazatricycloundecane scaffold via gold(i)-catalysed Conia-ene-type 5-exo-dig cyclization and stepwise substituent assembly for the construction of an sp3-rich compound library
Source: Royal Society of Chemistry journal article supplement (doi:10.1039/d3ob01534c), 2023-01-01

## Supporting Information

### Synthesis of diazatricycloundecane scaffold via gold(I)-catalysed Conia-ene-type 5-*exo-dig* cyclization and stepwise substituent assembly for construction of sp<sup>3</sup>-rich compound library

Tomoya Doi,<sup>1</sup> Kohei Umedera,<sup>1</sup> Kazuki Miura,<sup>1,2</sup> Taiki Morita,<sup>1,2</sup> Hiroyuki Nakamura\*<sup>1,2</sup>

- 1) School of Life Science and Technology, Tokyo Institute of Technology, 4259 Nagatsuta-cho, Midori-ku, Yokohama 226-8503, Japan.
- 2) Laboratory for Chemistry and Life Science, Institute of Innovative Research, Tokyo Institute of Technology, 4259 Nagatsuta-cho, Midori-ku, Yokohama 226-8503, Japan.

#### Table of contents

|                                                                                |    |
|--------------------------------------------------------------------------------|----|
| 1. Investigation of reduction of ketones ( <b>Table S1</b> , <b>Table S2</b> ) | S2 |
| 2. X-ray structural analysis of <b>13a</b>                                     | S3 |
| 3. PMI analysis of diazatricyclic compounds ( <b>Figure S1</b> )               | S6 |
| 4. References                                                                  | S7 |
| 5. NMR spectra                                                                 | S8 |

## 1. Investigation on reduction of ketones

**Table S1.** Investigation of reduction of ketone **11a**

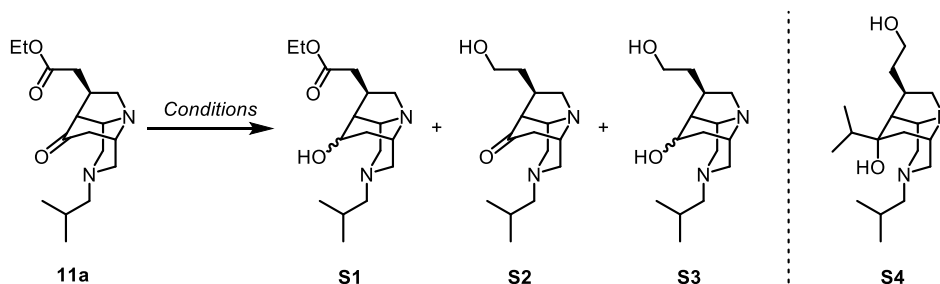

| Entry | Reagent                     | Solvent           | Temp.       | Time  | Yield (%) of S1/S2/S3/S4     |
|-------|-----------------------------|-------------------|-------------|-------|------------------------------|
| 1     | NaBH <sub>4</sub> (5.7 eq.) | EtOH              | rt to 50 °C | 28 h  | 0/31/0/-                     |
| 2     | Red-Al® (2.6 eq.)           | Et <sub>2</sub> O | 0 °C        | 6.5 h | 0/58/0/-                     |
| 3     | <i>i</i> -PrMgCl (4 eq.)    | THF               | 0 °C to rt  | 7 h   | 0/-/-/0                      |
| 4     | LiAlH <sub>4</sub> (7 eq.)  | Et <sub>2</sub> O | 0 °C to rt  | 2 h   | 0/trace/< 93 <sup>a</sup> /- |

<sup>a</sup> diol **S3** was obtained as a mixture of unidentified byproducts.

**Table S2.** Ketone-selective reduction of **12a** with various reductants

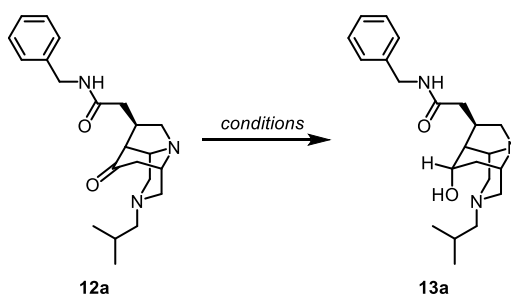

| Entry | Reagent                                       | Solvent           | Temp.          | Time (h)  | Yield (%)       |
|-------|-----------------------------------------------|-------------------|----------------|-----------|-----------------|
| 1     | LiAlH <sub>4</sub> (7 eq.)                    | Et <sub>2</sub> O | 0 °C           | 2         | 8               |
| 2     | NaBH <sub>4</sub> (5 eq.)                     | MeOH              | 0 °C to 40 °C  | 5         | 8               |
|       | CeCl <sub>3</sub> · 7H <sub>2</sub> O (5 eq.) |                   |                |           |                 |
| 3     | LiBH <sub>4</sub> (4 eq.)                     | Et <sub>2</sub> O | 0 °C           | 1         | Not detected    |
| 4     | NaBH <sub>4</sub> (15 eq.)                    | EtOH              | 0 °C to reflux | Overnight | Not detected    |
| 5     | L-selectride® (4 eq.)                         | THF               | -78 °C to rt   | 12        | No reaction     |
| 6     | DIBAL-H (6 eq.)                               | THF               | -78 °C to rt   | Overnight | Complex mixture |
| 7     | Al( <i>Oi</i> -Pr) <sub>3</sub> (10 eq.)      | <i>i</i> -PrOH    | reflux         | 10        | No reaction     |
| 8     | SmI <sub>2</sub> (3 eq.)                      | THF               | -78 °C         | 2         | 71              |
|       | H <sub>2</sub> O (30 eq.)                     |                   |                |           |                 |

## 2. X-ray structural analysis of 13a (cr171127)

### checkCIF/PLATON report

Structure factors have been supplied for datablock(s) cr171127\_auto

THIS REPORT IS FOR GUIDANCE ONLY. IF USED AS PART OF A REVIEW PROCEDURE FOR PUBLICATION, IT SHOULD NOT REPLACE THE EXPERTISE OF AN EXPERIENCED CRYSTALLOGRAPHIC REFEREE.

No syntax errors found.    CIF dictionary    Interpreting this report

### Datablock: cr171127\_auto

---

Bond precision:    C-C = 0.0022 A                      Wavelength=1.54184  
Cell:                      a=16.4271 (3)              b=9.6289 (2)              c=12.6774 (2)  
                                    alpha=90                      beta=96.421 (2)              gamma=90  
Temperature:              90 K

|                        | Calculated    | Reported      |
|------------------------|---------------|---------------|
| Volume                 | 1992.67 (6)   | 1992.67 (6)   |
| Space group            | P 21/c        | P 1 21/c 1    |
| Hall group             | -P 2ybc       | -P 2ybc       |
| Moiety formula         | C22 H33 N3 O2 | C22 H33 N3 O2 |
| Sum formula            | C22 H33 N3 O2 | C22 H33 N3 O2 |
| Mr                     | 371.51        | 371.51        |
| Dx, g cm <sup>-3</sup> | 1.238         | 1.238         |
| Z                      | 4             | 4             |
| Mu (mm <sup>-1</sup> ) | 0.628         | 0.628         |
| F000                   | 808.0         | 808.0         |
| F000'                  | 810.21        |               |
| h, k, lmax             | 20, 12, 15    | 20, 11, 15    |
| Nref                   | 4176          | 4044          |
| Tmin, Tmax             | 0.919, 0.992  | 0.807, 1.000  |
| Tmin'                  | 0.919         |               |

Correction method= # Reported T Limits: Tmin=0.807 Tmax=1.000

AbsCorr = MULTI-SCAN

Data completeness= 0.968                      Theta(max) = 76.633

R(reflections)= 0.0497 ( 3610)

wR2(reflections)=  
0.1213 ( 4044)

S = 1.069

Npar= 247

---

The following ALERTS were generated. Each ALERT has the format

**test-name\_ALERT\_alert-type\_alert-level.**

Click on the hyperlinks for more details of the test.

---

● **Alert level C**

DIFMX02\_ALERT\_1\_C The maximum difference density is > 0.1\*ZMAX\*0.75  
The relevant atom site should be identified.  
PLAT094\_ALERT\_2\_C Ratio of Maximum / Minimum Residual Density .... 3.01 Report  
PLAT097\_ALERT\_2\_C Large Reported Max. (Positive) Residual Density 0.75 eA-3  
PLAT906\_ALERT\_3\_C Large K Value in the Analysis of Variance ..... 5.237 Check

---

● **Alert level G**

PLAT007\_ALERT\_5\_G Number of Unrefined Donor-H Atoms ..... 2 Report  
PLAT793\_ALERT\_4\_G Model has Chirality at C1 (Centro SPGR) R Verify  
PLAT793\_ALERT\_4\_G Model has Chirality at C2 (Centro SPGR) S Verify  
PLAT793\_ALERT\_4\_G Model has Chirality at C3 (Centro SPGR) S Verify  
PLAT793\_ALERT\_4\_G Model has Chirality at C5 (Centro SPGR) S Verify  
PLAT793\_ALERT\_4\_G Model has Chirality at C9 (Centro SPGR) R Verify  
PLAT912\_ALERT\_4\_G Missing # of FCF Reflections Above STh/L= 0.600 117 Note  
PLAT978\_ALERT\_2\_G Number C-C Bonds with Positive Residual Density. 12 Info

---

0 **ALERT level A** = Most likely a serious problem - resolve or explain  
0 **ALERT level B** = A potentially serious problem, consider carefully  
4 **ALERT level C** = Check. Ensure it is not caused by an omission or oversight  
8 **ALERT level G** = General information/check it is not something unexpected

1 ALERT type 1 CIF construction/syntax error, inconsistent or missing data  
3 ALERT type 2 Indicator that the structure model may be wrong or deficient  
1 ALERT type 3 Indicator that the structure quality may be low  
6 ALERT type 4 Improvement, methodology, query or suggestion  
1 ALERT type 5 Informative message, check

---

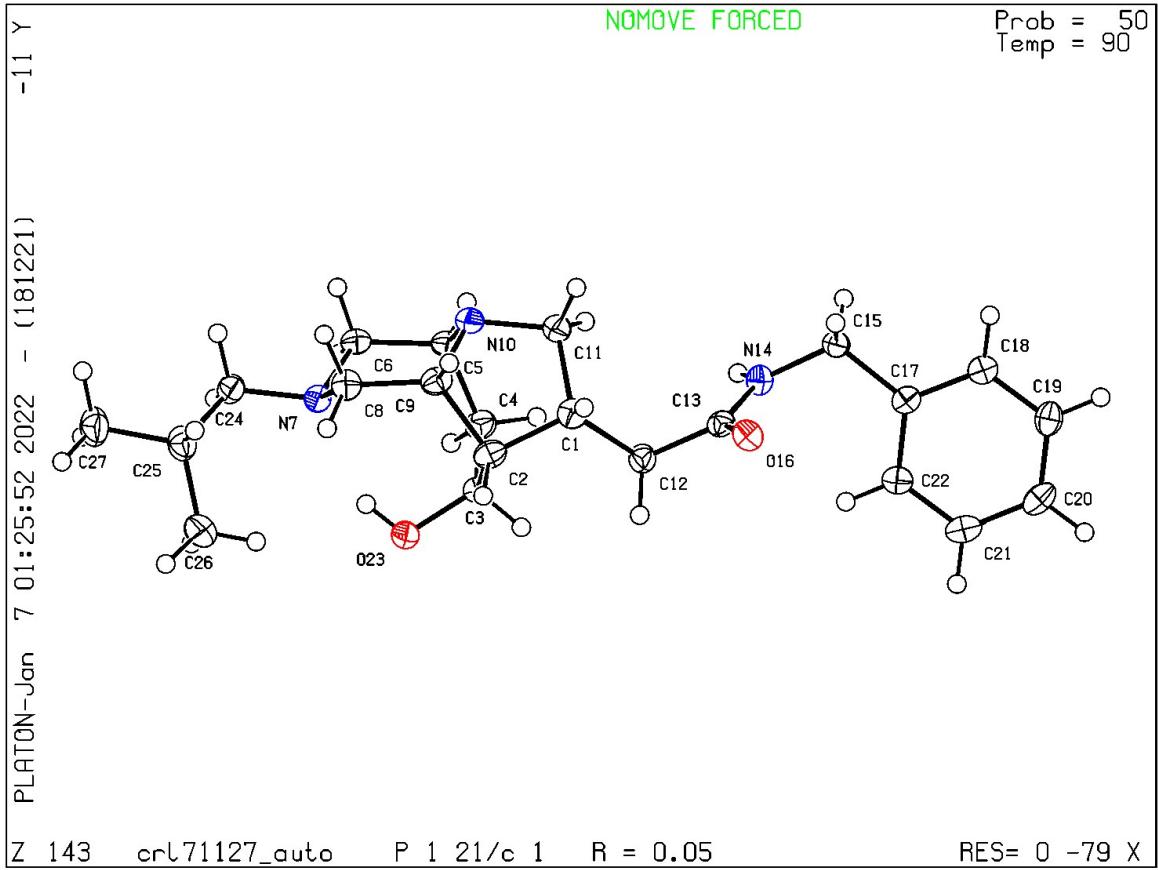

### 3. PMI analysis of diazatricyclic compounds

#### (a) structure of tricyclic compounds

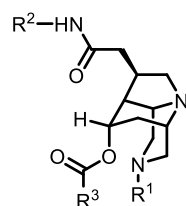

**6a-h**

diazatricycloundecane  
 $R^1, R^2, R^3 = \text{Bn or } i\text{-Bu}$   
(This work)

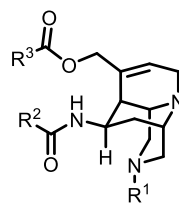

**3**

diazatricyclododecene  
 $R^1, R^2, R^3 = \text{Bn or } i\text{-Bu}$   
(Previous work)

#### (b) PMI analysis of tricyclic compounds

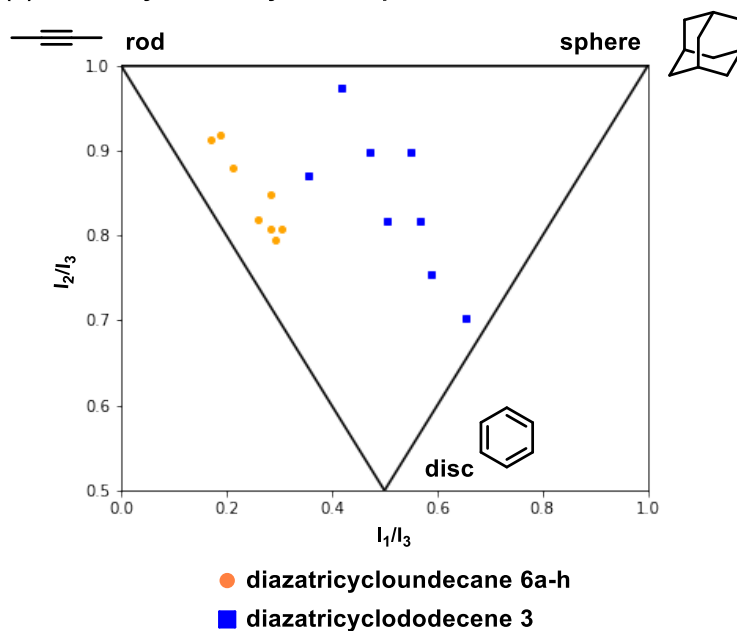

**Figure S1.** PMI analysis of compounds with diazatricyclic scaffolds. (a) chemical structures used for PMI analysis. (b) PMI plot<sup>[1]</sup> of diazatricycloundecanes **6a-h** (orange circle) and diazatricyclododecenes **3** with three isobutyl or benzyl groups (blue square). Conformers with the lowest energy generated by iCon<sup>[2]</sup> implemented in LigandScout 4.4.5 were used for the analysis. PMI = principal moment of inertia.

#### 4. References

1. W. H. B. Sauer and M. K. Schwarz, *J. Chem. Inf. Comput. Sci.*, 2003, **43**, 987–1003.
2. G. Poli, T. Seidel and T. Langer, *Front Chem.*, 2018, **6**, 229.

## 5. NMR spectra

### Ketone 8 ( $^1\text{H}$ NMR, $\text{CDCl}_3$ , 400 MHz)

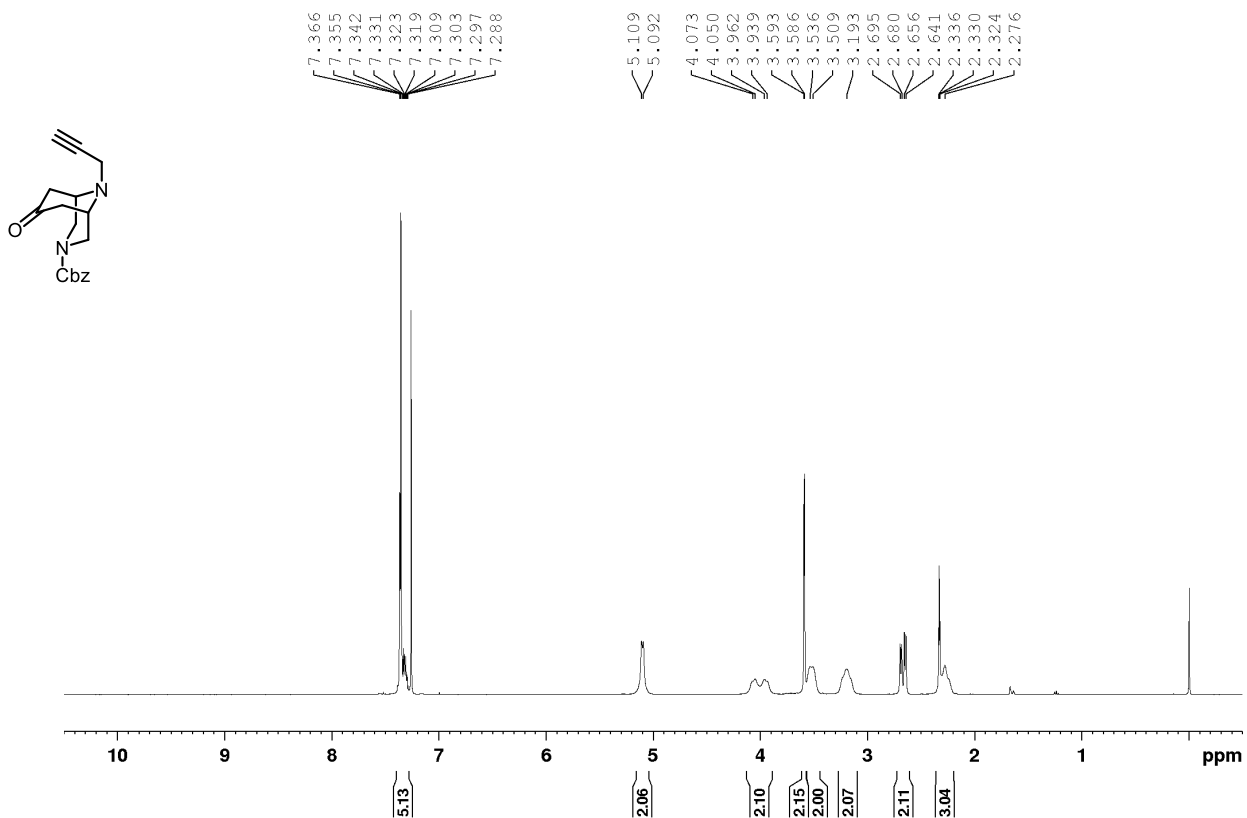

### Ketone 8 ( $^{13}\text{C}$ NMR, $\text{CDCl}_3$ , 125 MHz)

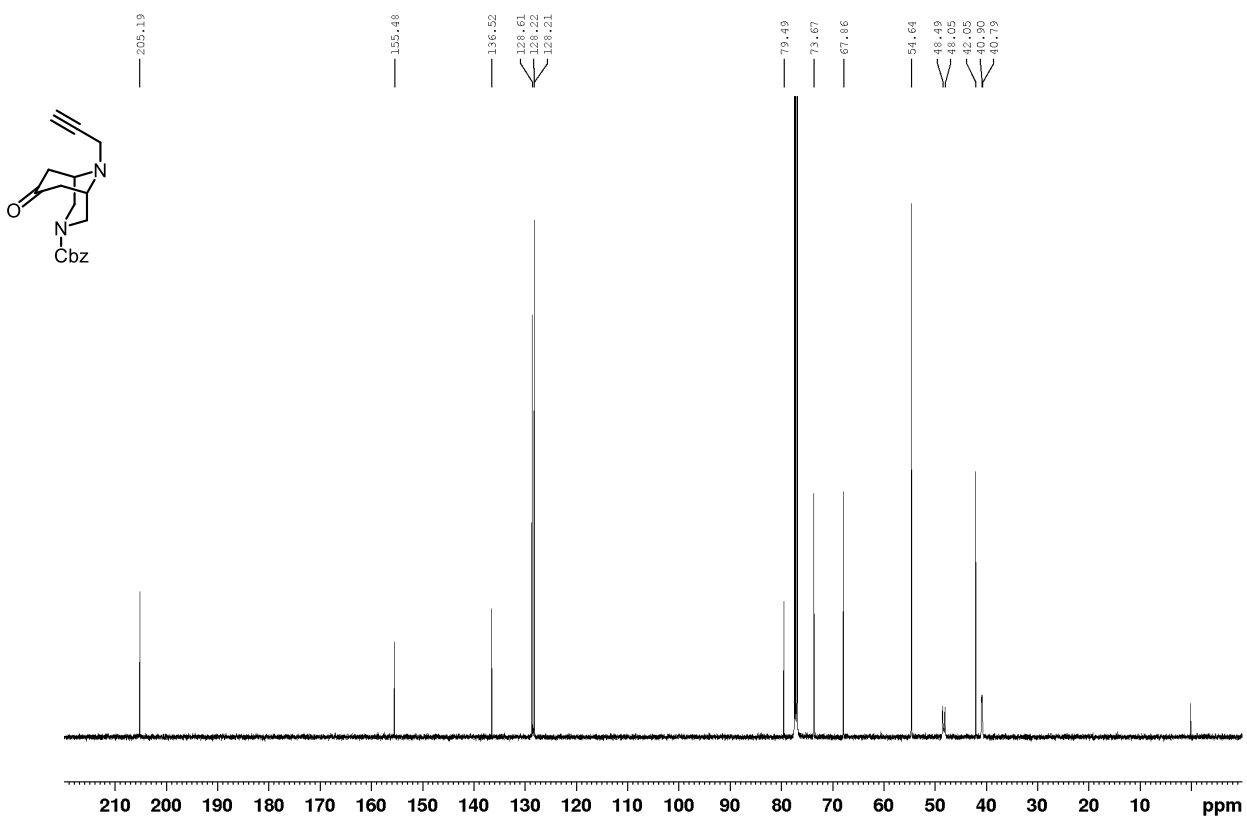



Silyl enol ether **9** ( $^1\text{H}$  NMR,  $\text{CDCl}_3$ , 400 MHz)

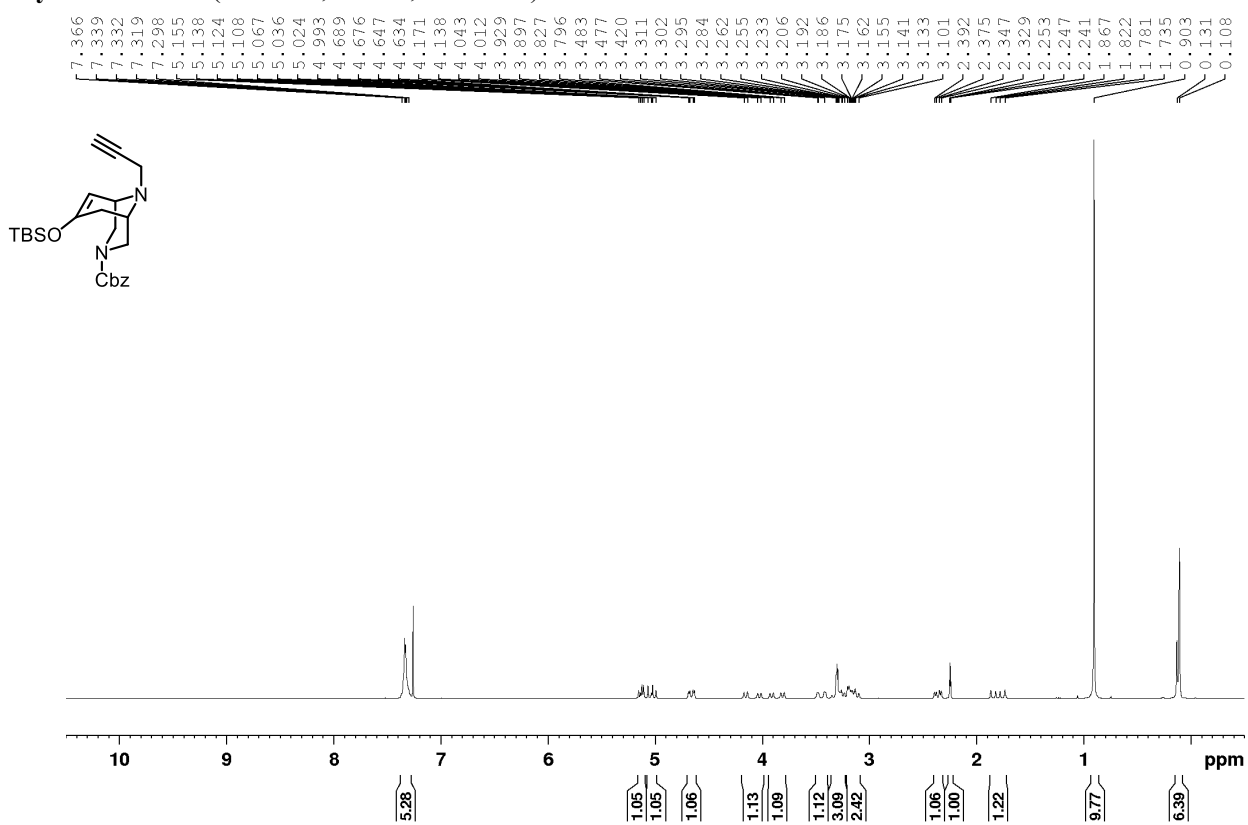

Silyl enol ether **9** ( $^{13}\text{C}$  NMR,  $\text{CDCl}_3$ , 100 MHz)

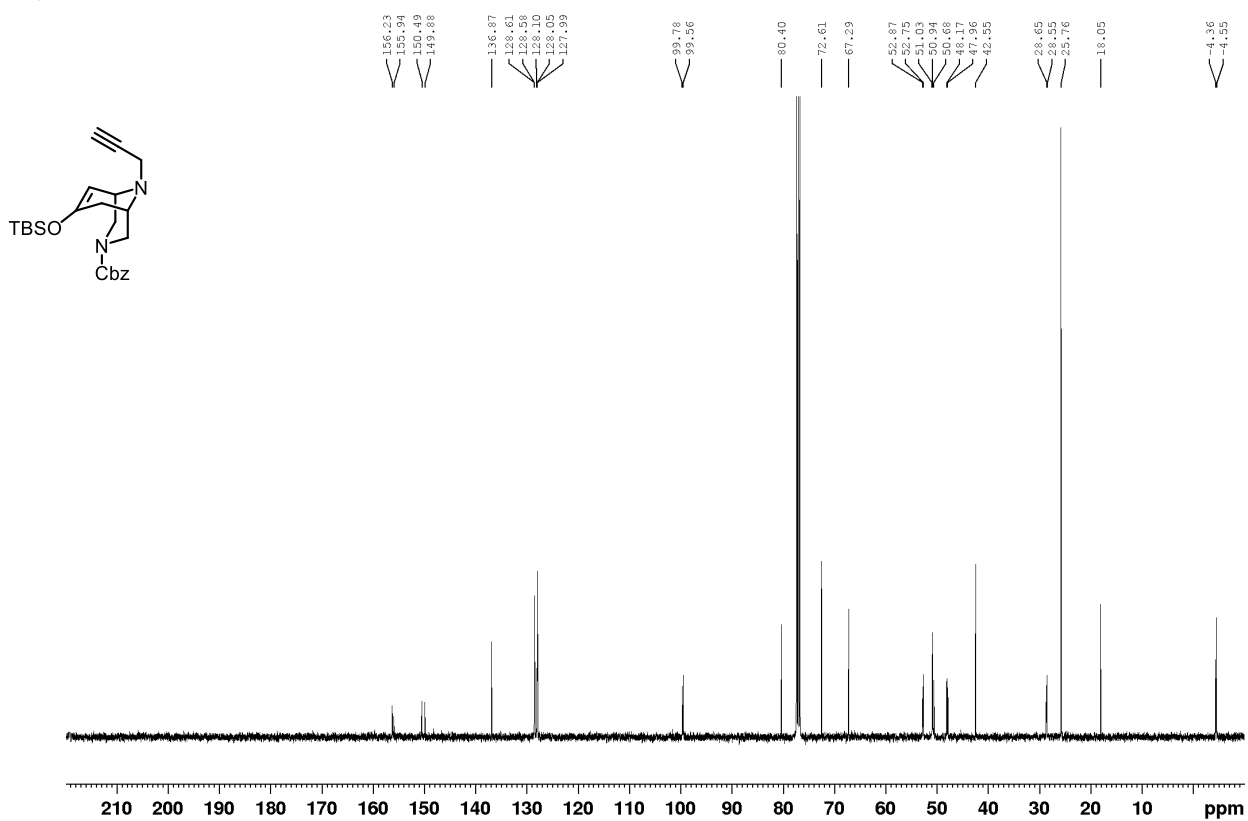

**Ester 4** ( $^1\text{H}$  NMR,  $\text{CDCl}_3$ , 400 MHz)

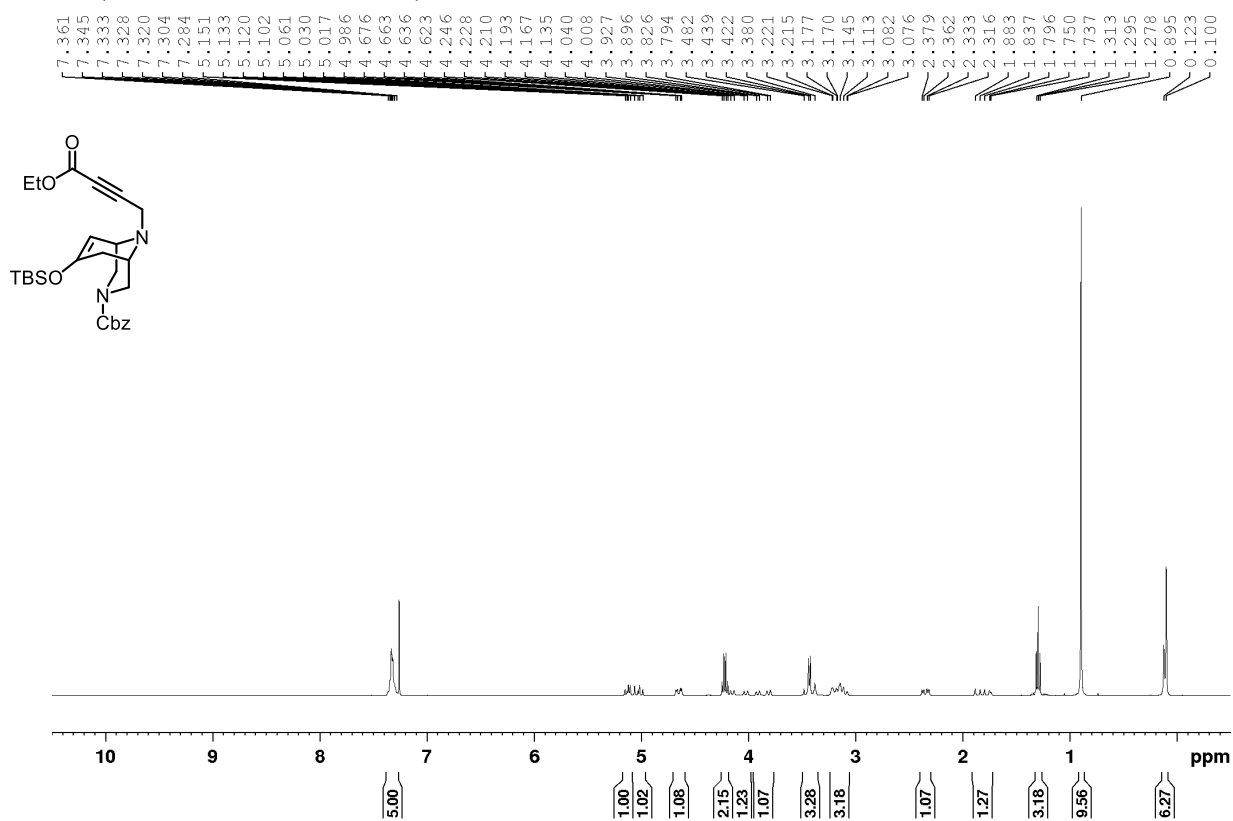

**Ester 4** ( $^{13}\text{C}$  NMR,  $\text{CDCl}_3$ , 100 MHz)

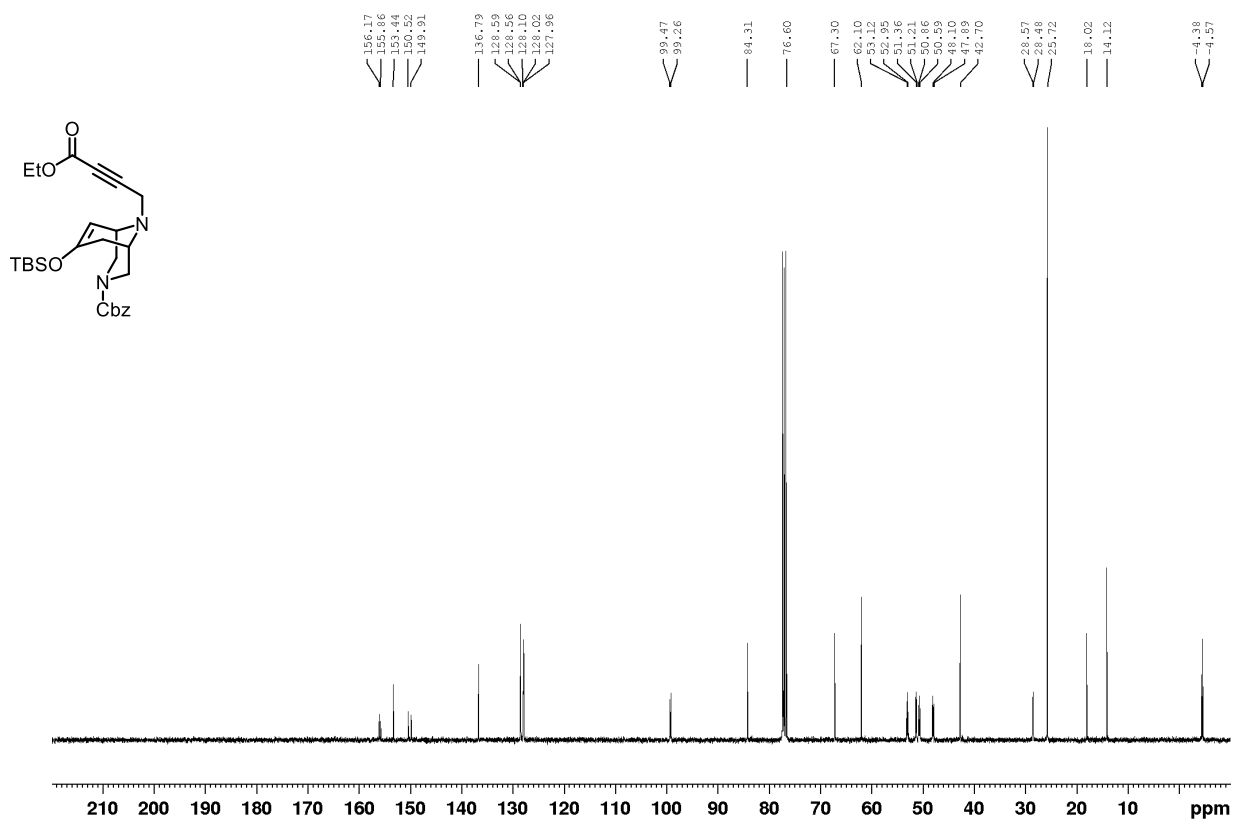

**Ester 10** ( $^1\text{H}$  NMR,  $\text{CDCl}_3$ , 400 MHz)

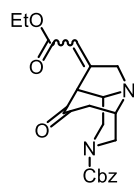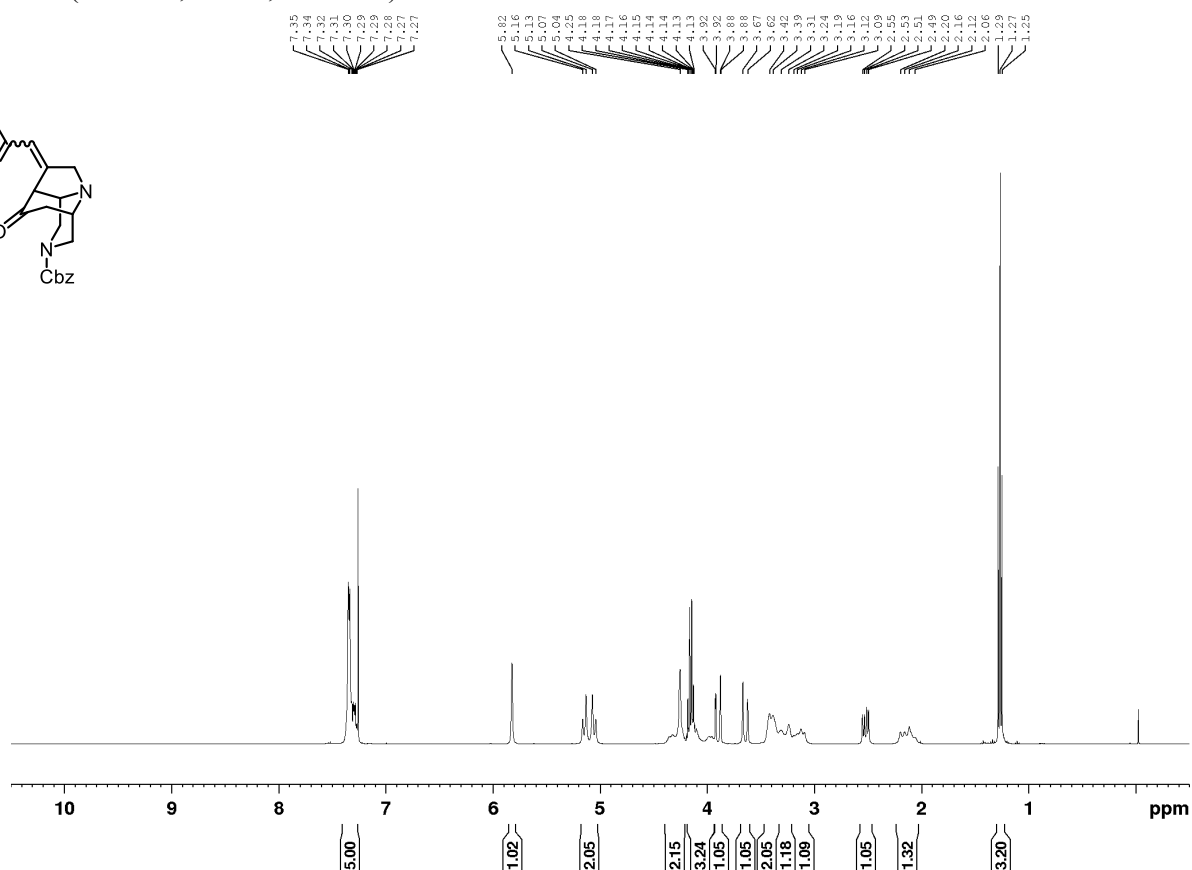

**Ester 10** ( $^{13}\text{C}$  NMR,  $\text{CDCl}_3$ , 125 MHz)

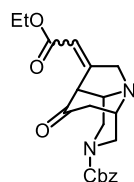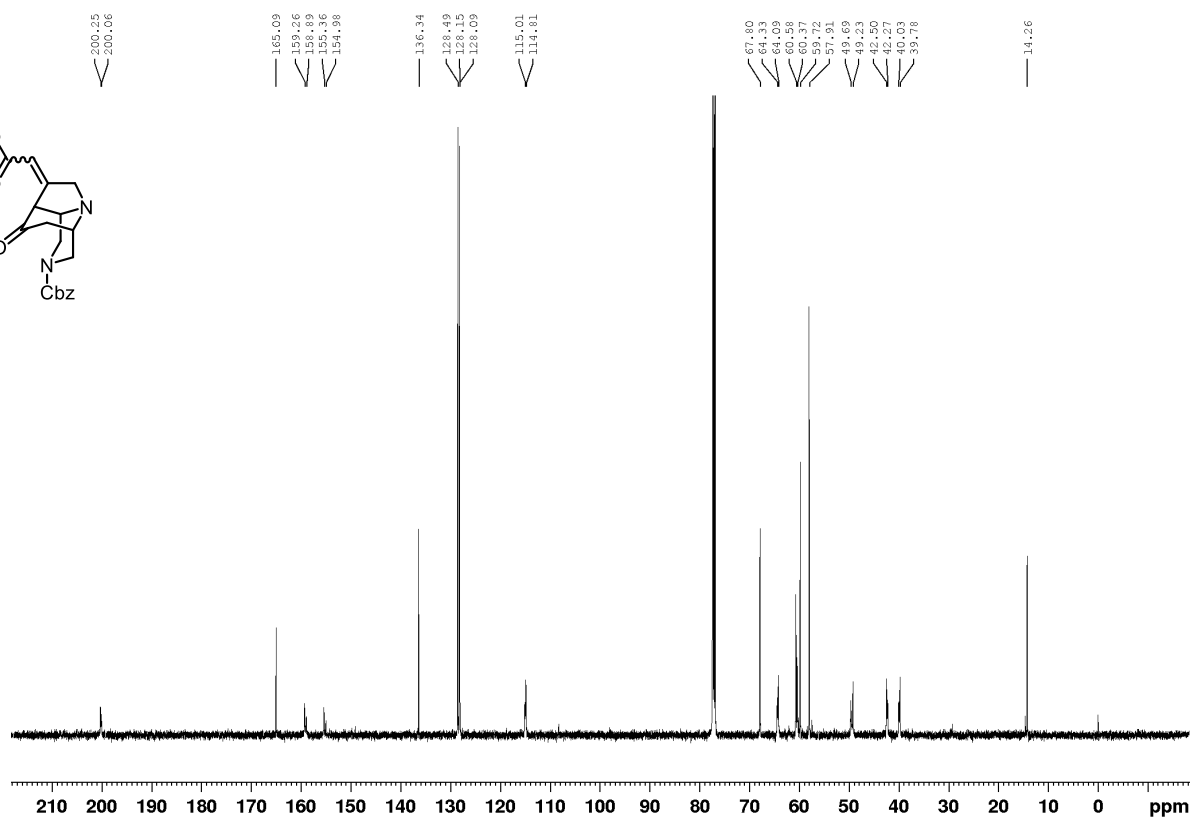

Diazatricycloundecane 5 (<sup>1</sup>H NMR, CDCl<sub>3</sub>, 500 MHz)

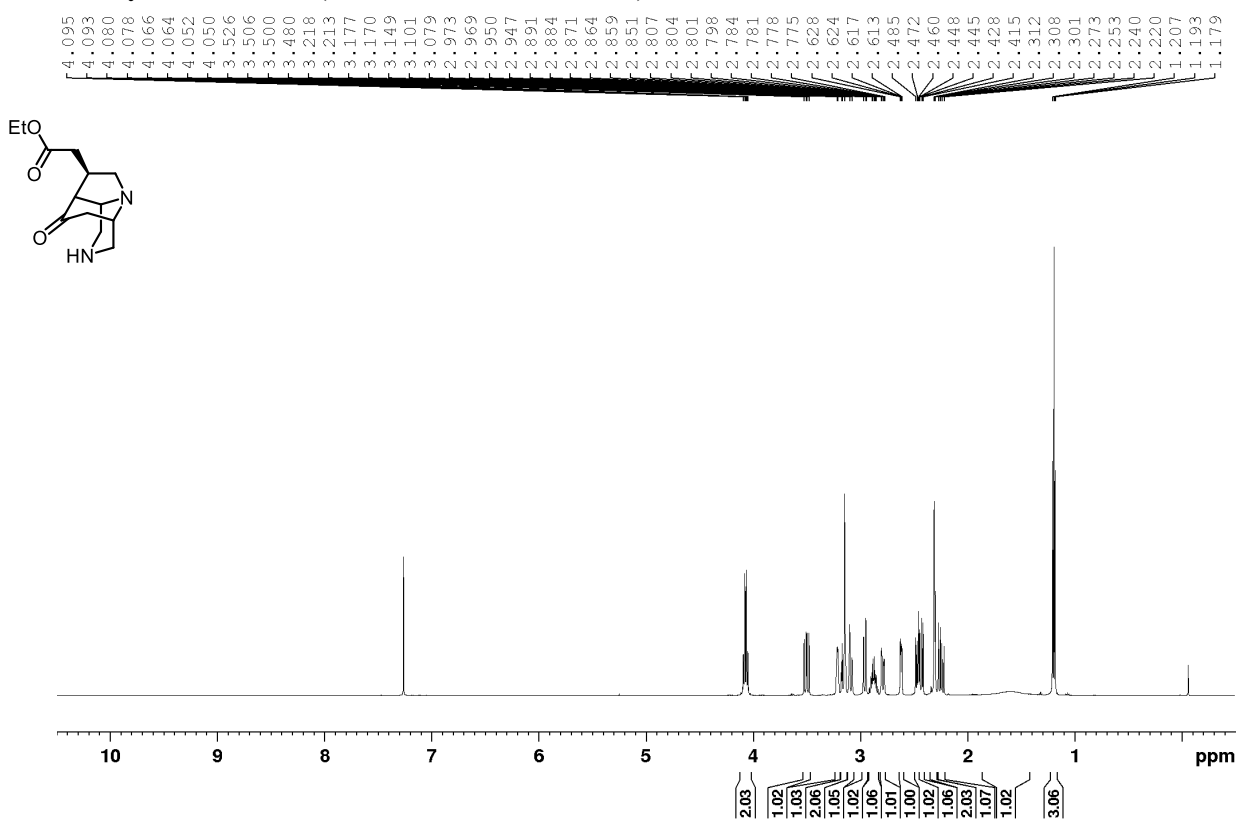

Diazatricycloundecane 5 (<sup>13</sup>C NMR, CDCl<sub>3</sub>, 125 MHz)

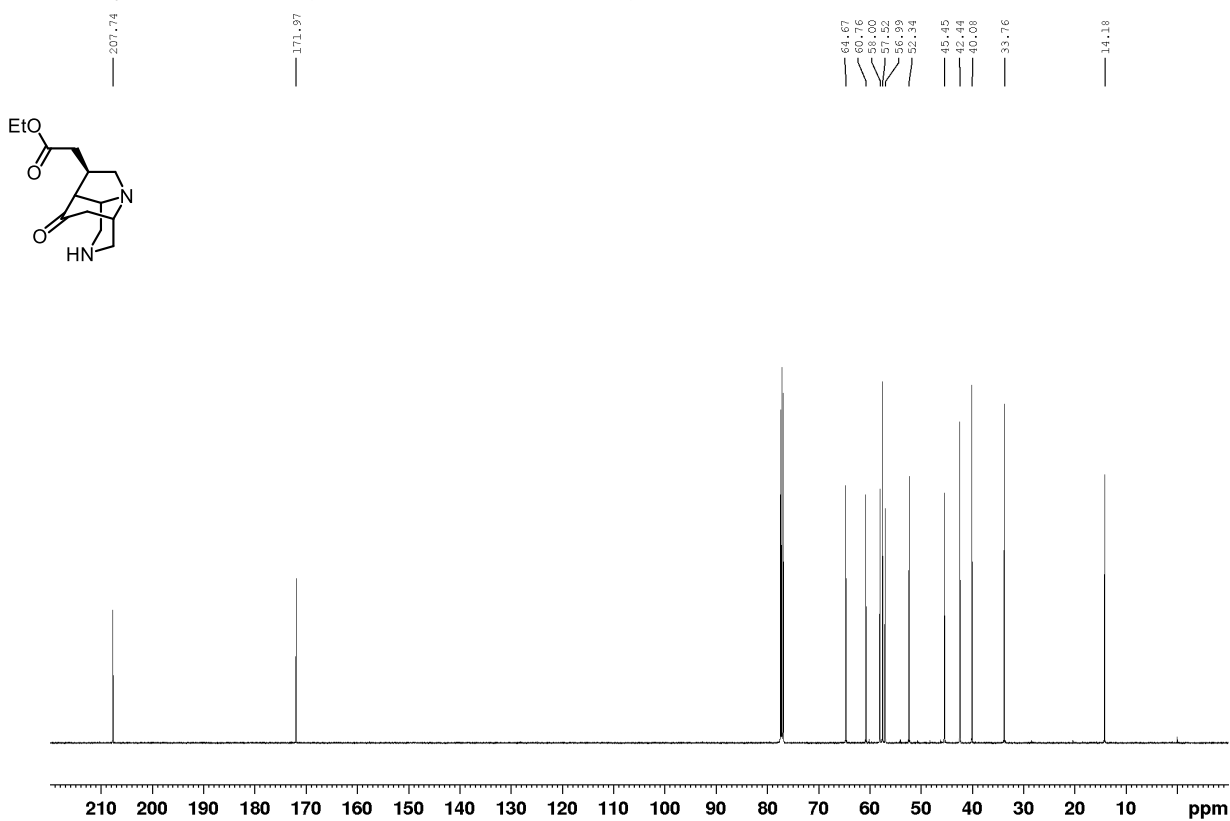

**Ketone 11a** ( $^1\text{H}$  NMR,  $\text{CDCl}_3$ , 400 MHz)

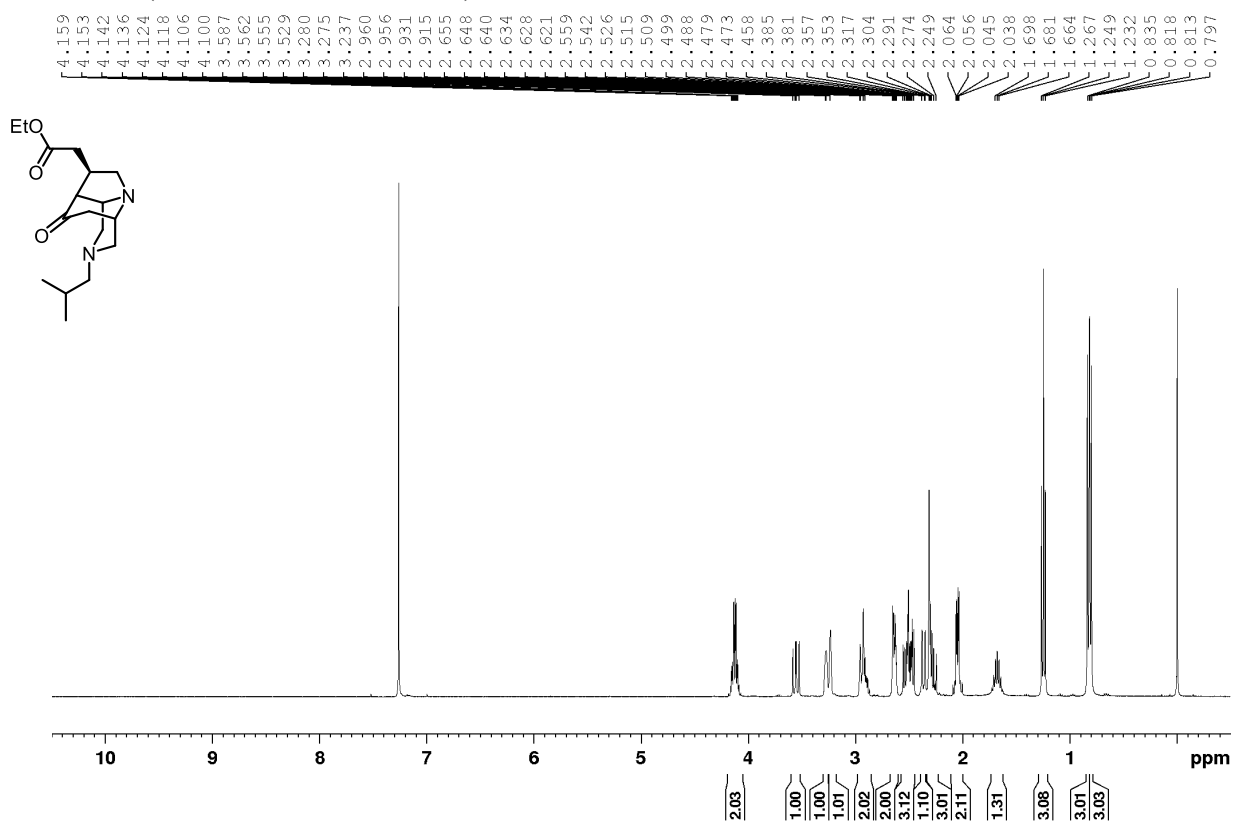

**Ketone 11a** ( $^{13}\text{C}$  NMR,  $\text{CDCl}_3$ , 125 MHz)

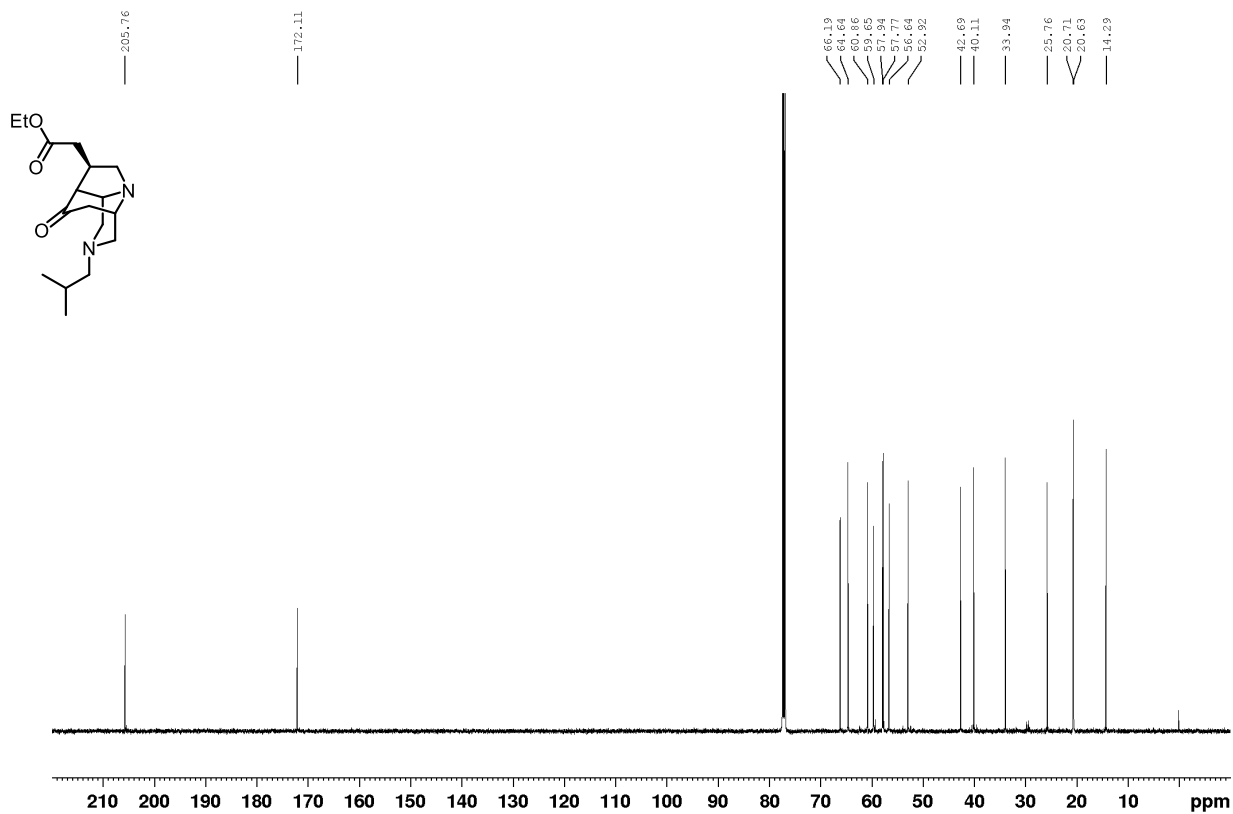

**Ketone 11b** ( $^1\text{H}$  NMR,  $\text{CDCl}_3$ , 500 MHz)

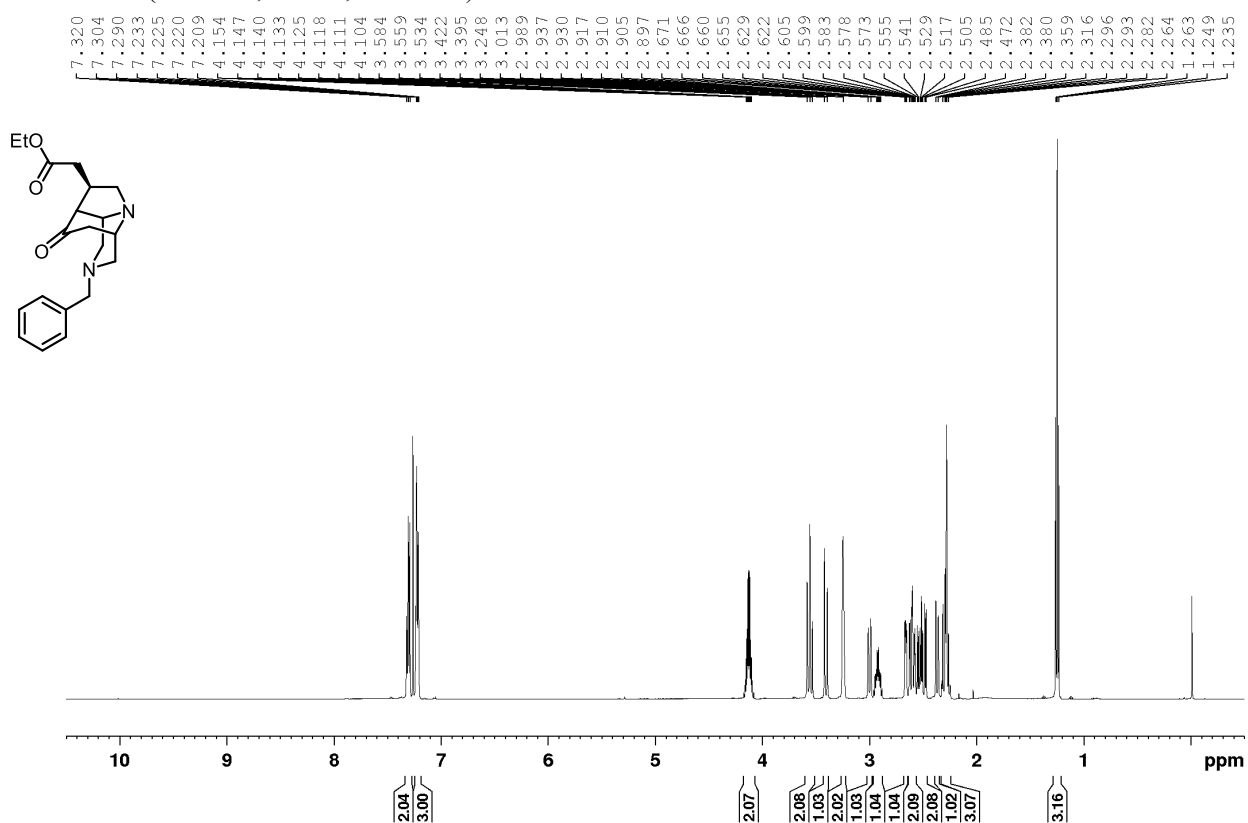

**Ketone 11b** ( $^{13}\text{C}$  NMR,  $\text{CDCl}_3$ , 125 MHz)

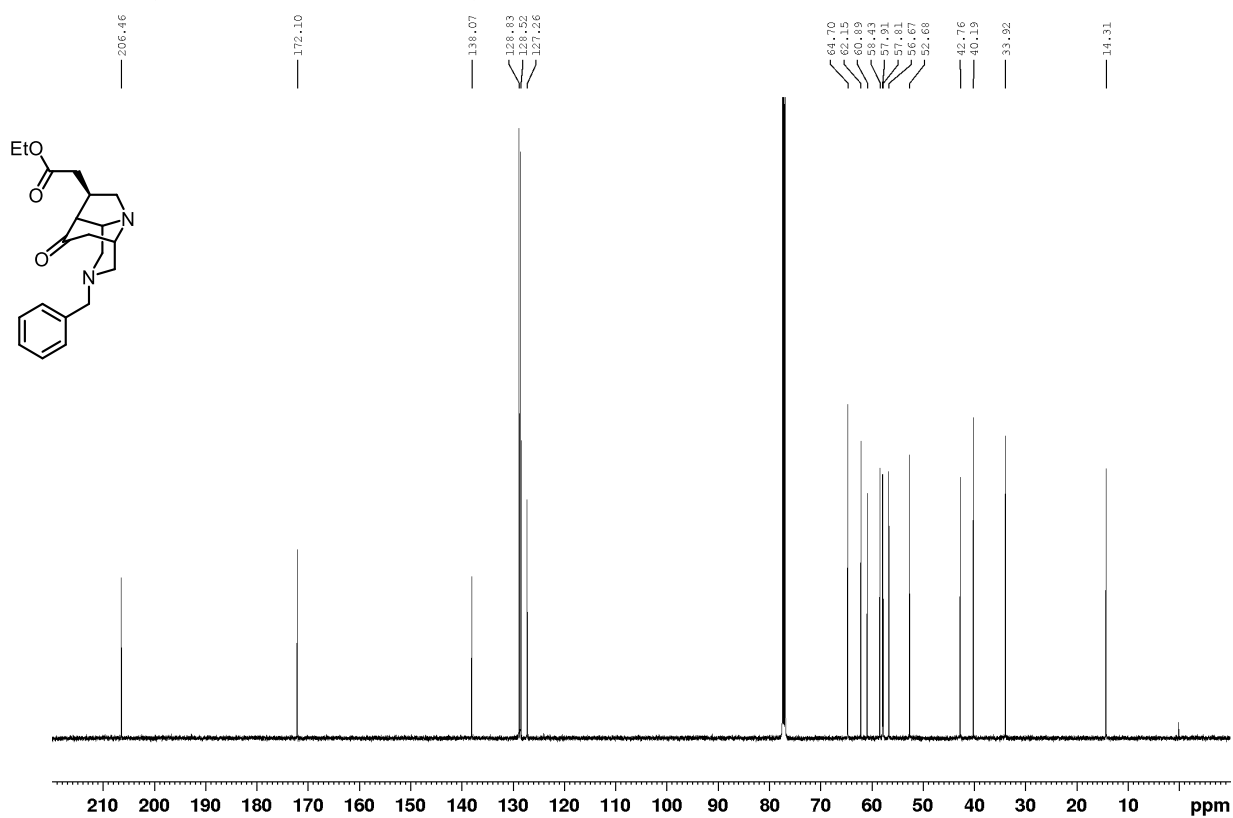

Alcohol S2 ( $^1\text{H}$  NMR,  $\text{CDCl}_3$ , 500 MHz)

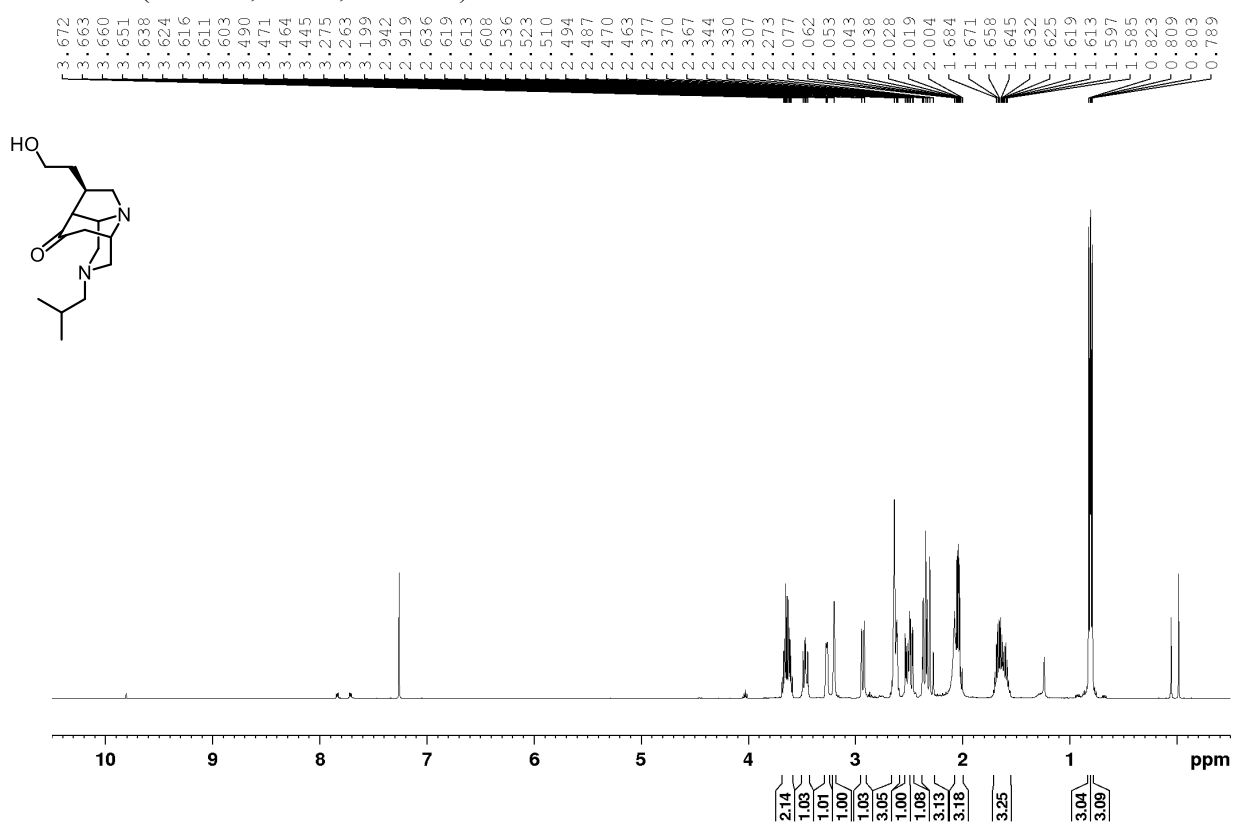

Alcohol S2 ( $^{13}\text{C}$  NMR,  $\text{CDCl}_3$ , 100 MHz)

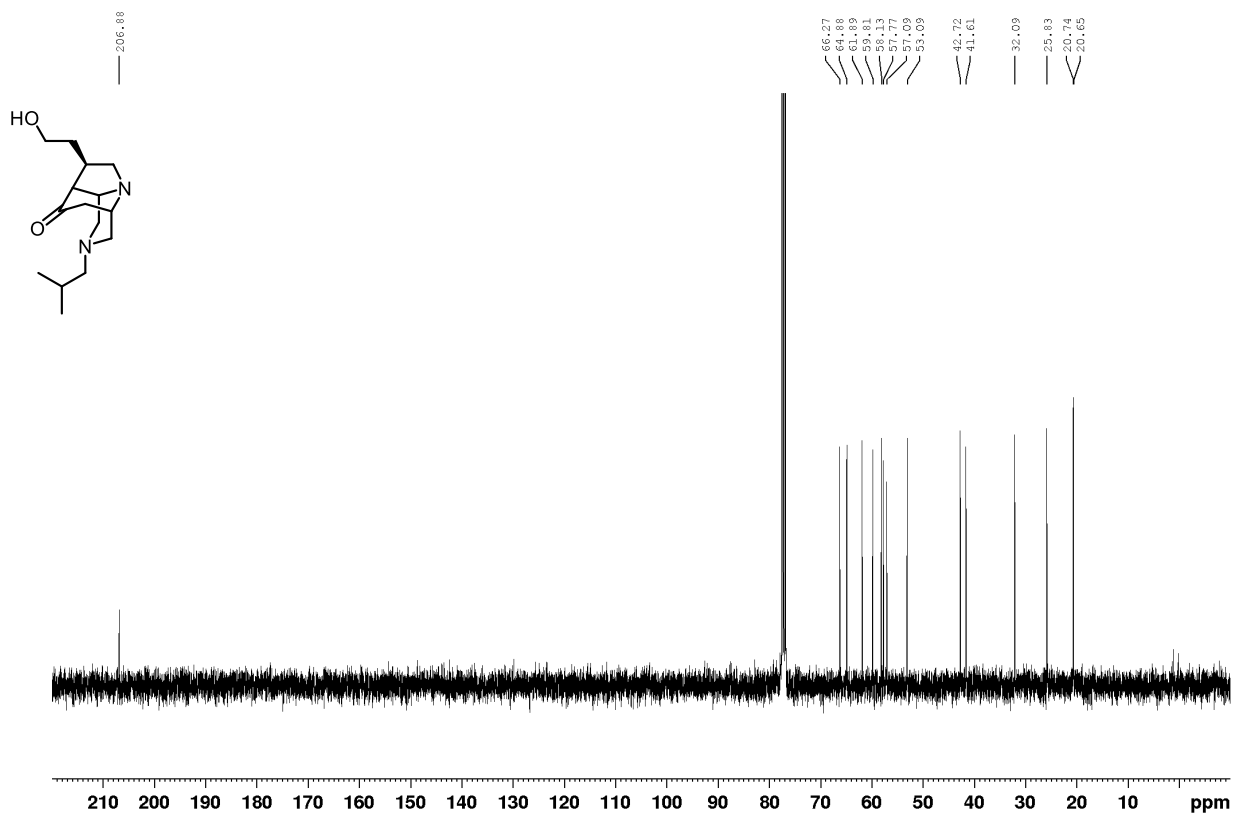

Amide 12a (<sup>1</sup>H NMR, CDCl<sub>3</sub>, 500 MHz)

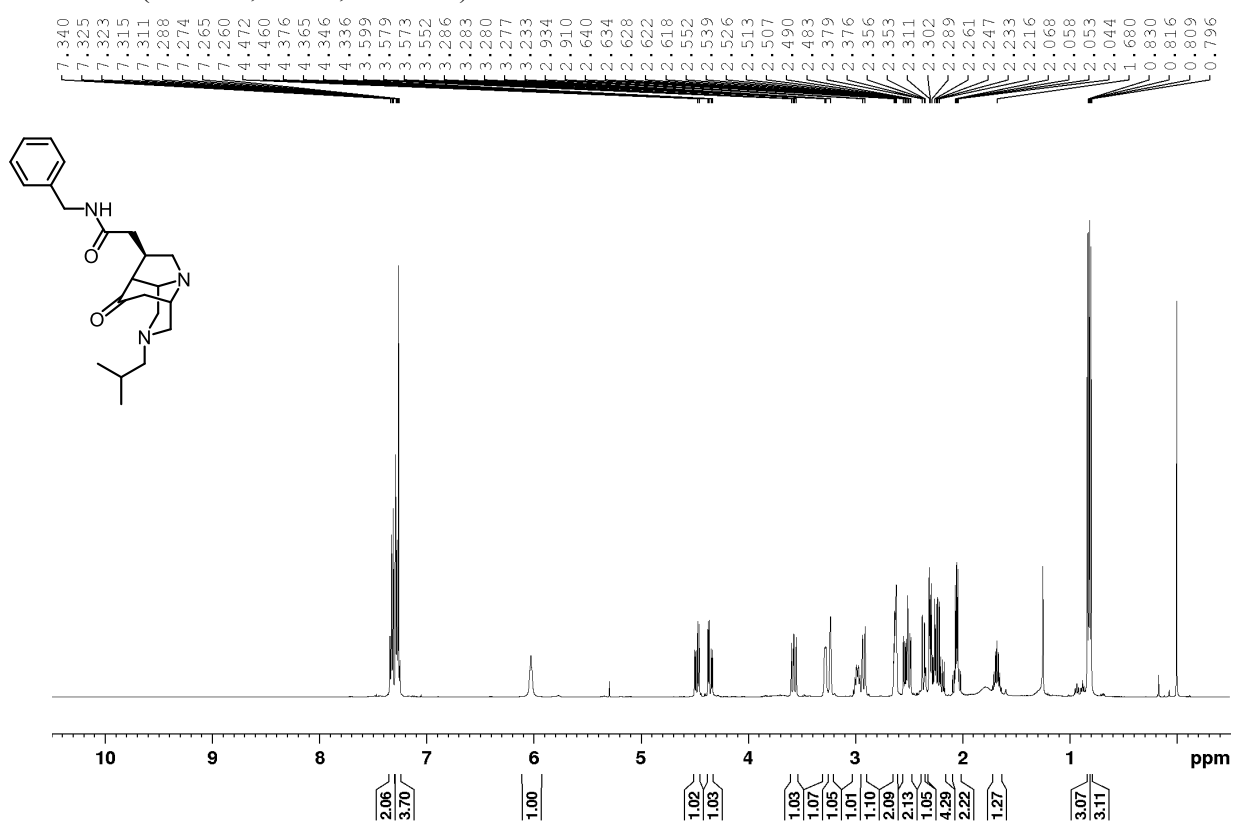

Amide 12a (<sup>13</sup>C NMR, CDCl<sub>3</sub>, 125 MHz)

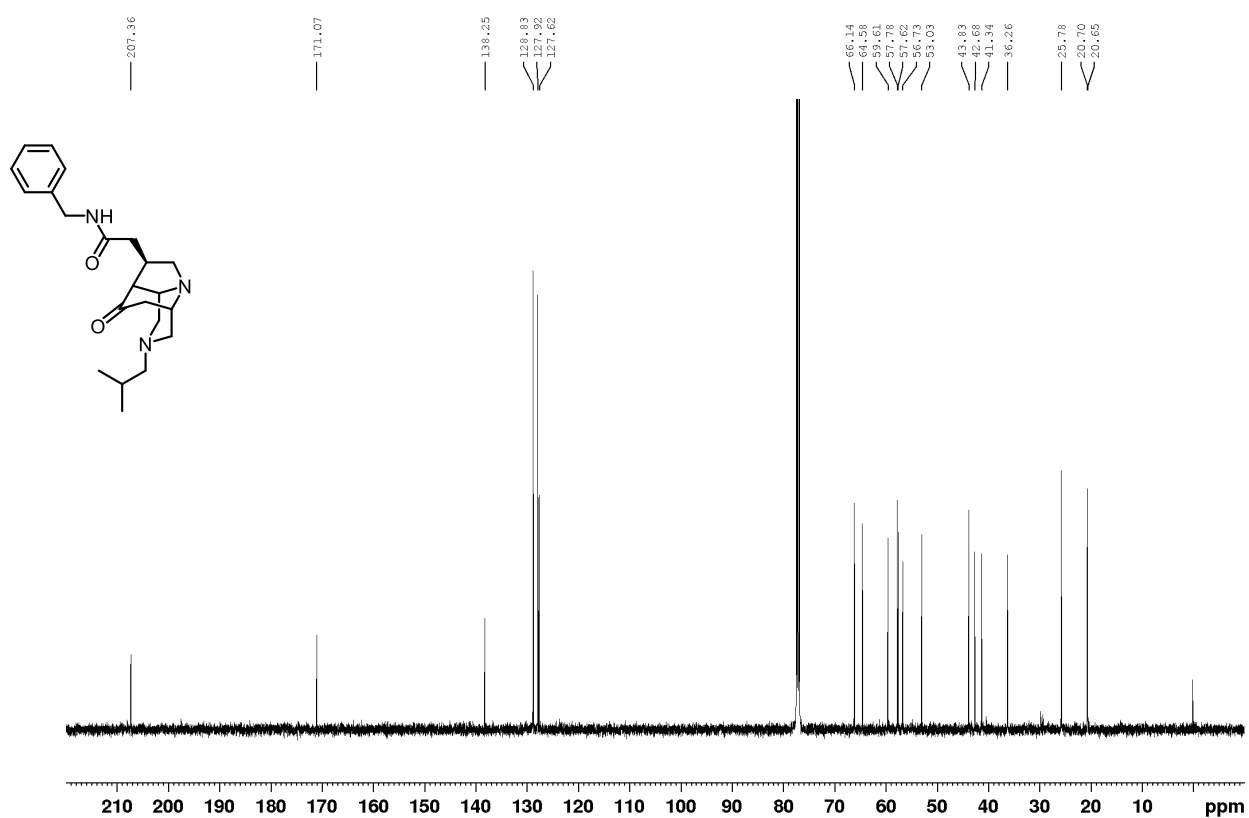



Amide 12b (<sup>1</sup>H NMR, CDCl<sub>3</sub>, 500 MHz)

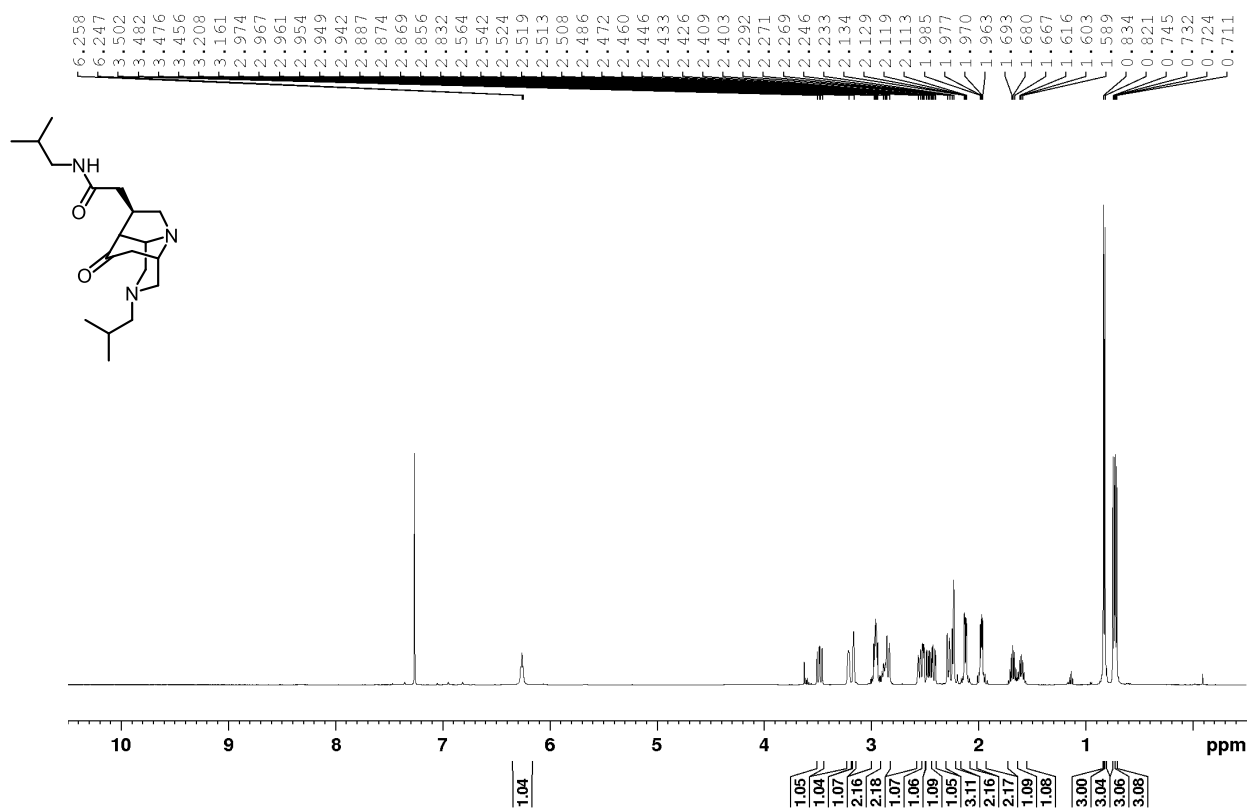

Amide 12b (<sup>13</sup>C NMR, CDCl<sub>3</sub>, 125 MHz)

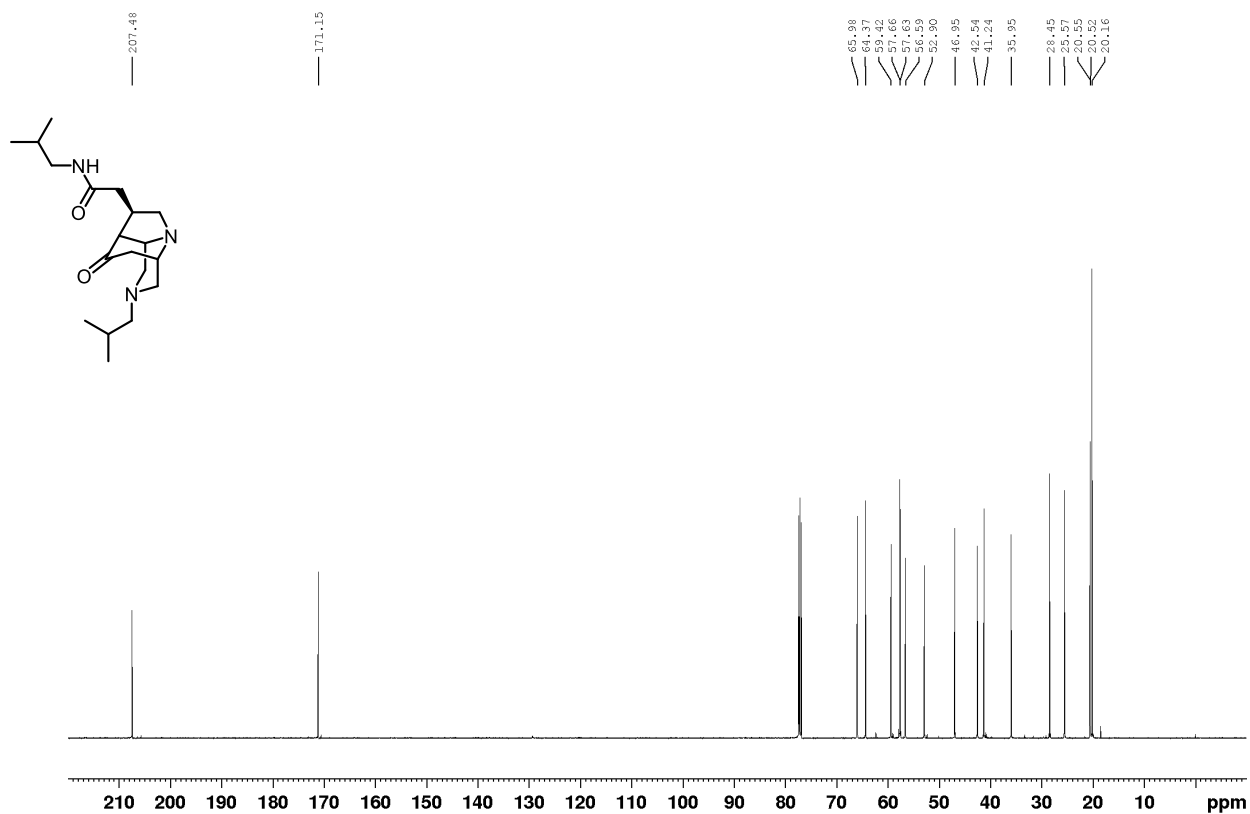

Amide 12c ( $^1\text{H}$  NMR,  $\text{CDCl}_3$ , 400 MHz)

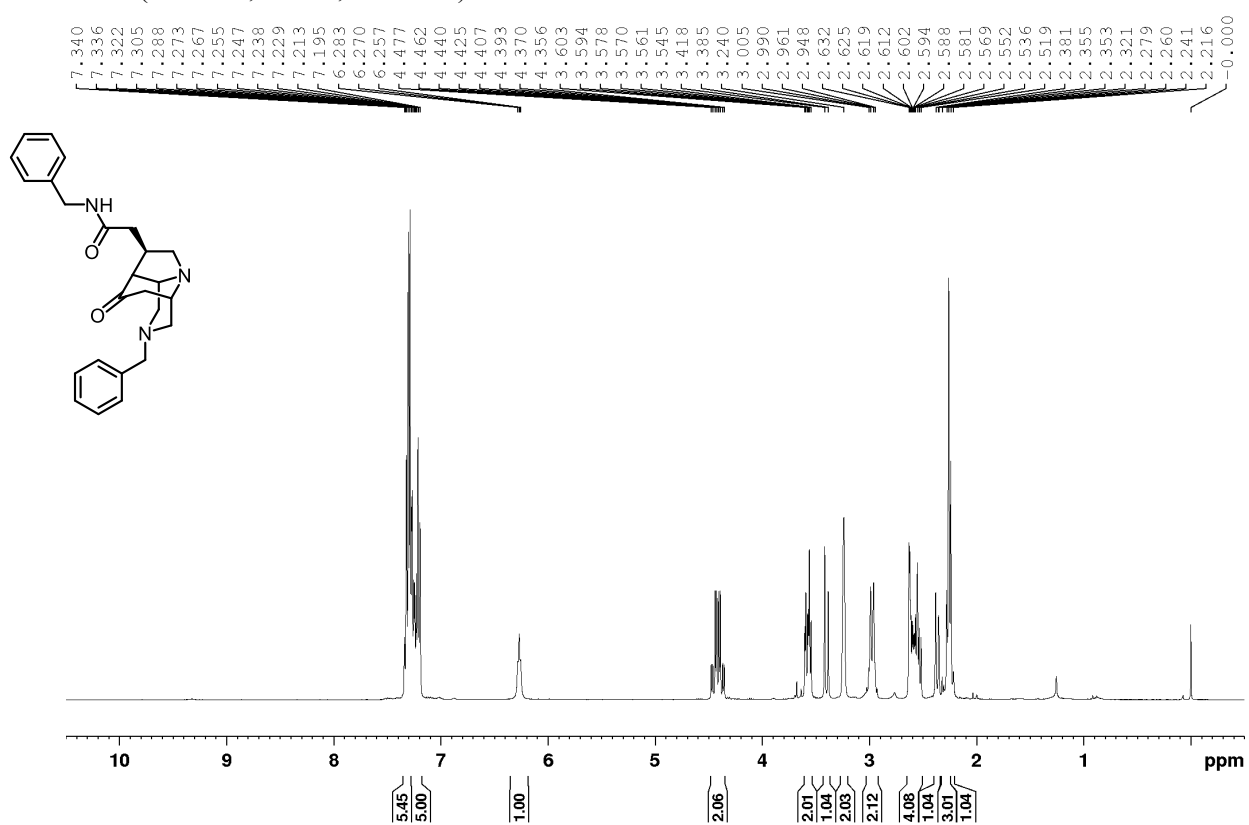

Amide 12c ( $^{13}\text{C}$  NMR,  $\text{CDCl}_3$ , 125 MHz)

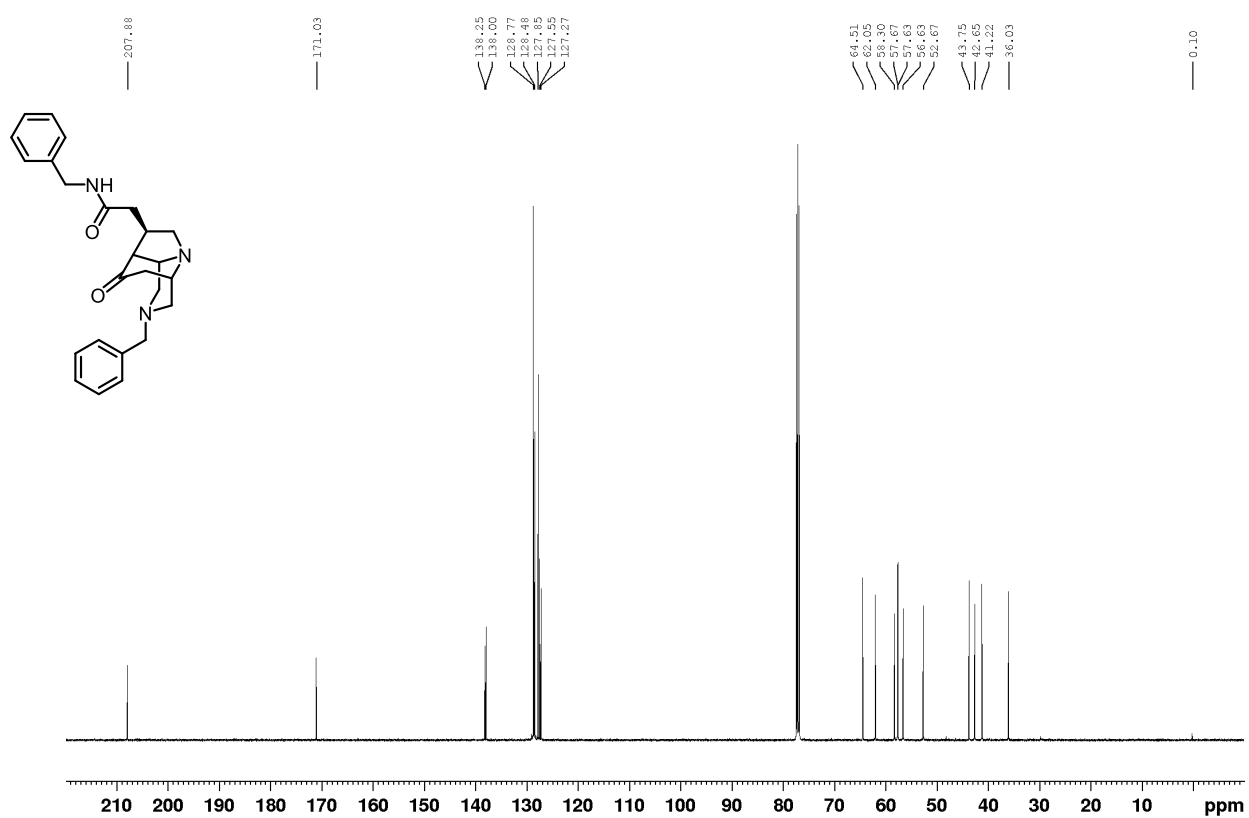

Amide 12d (<sup>1</sup>H NMR, CDCl<sub>3</sub>, 400 MHz)

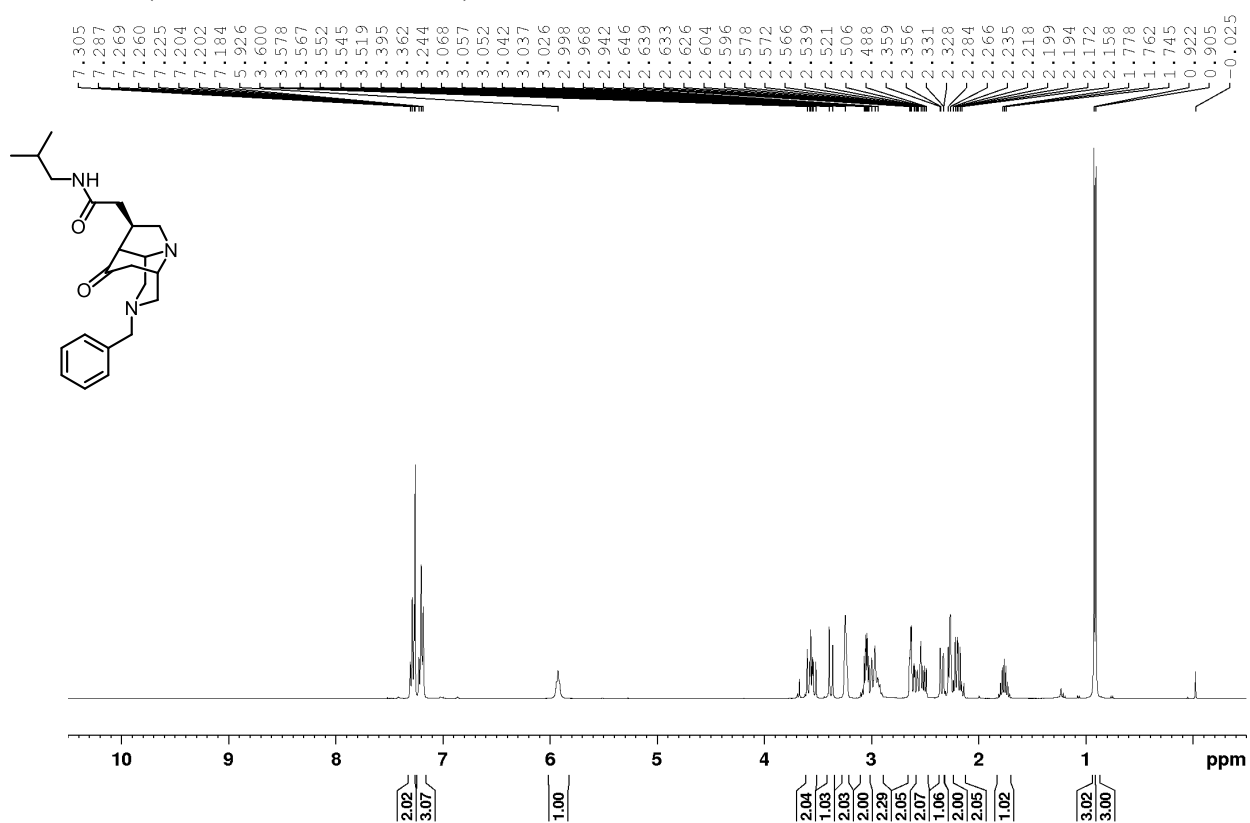

Amide 12d (<sup>13</sup>C NMR, CDCl<sub>3</sub>, 125 MHz)

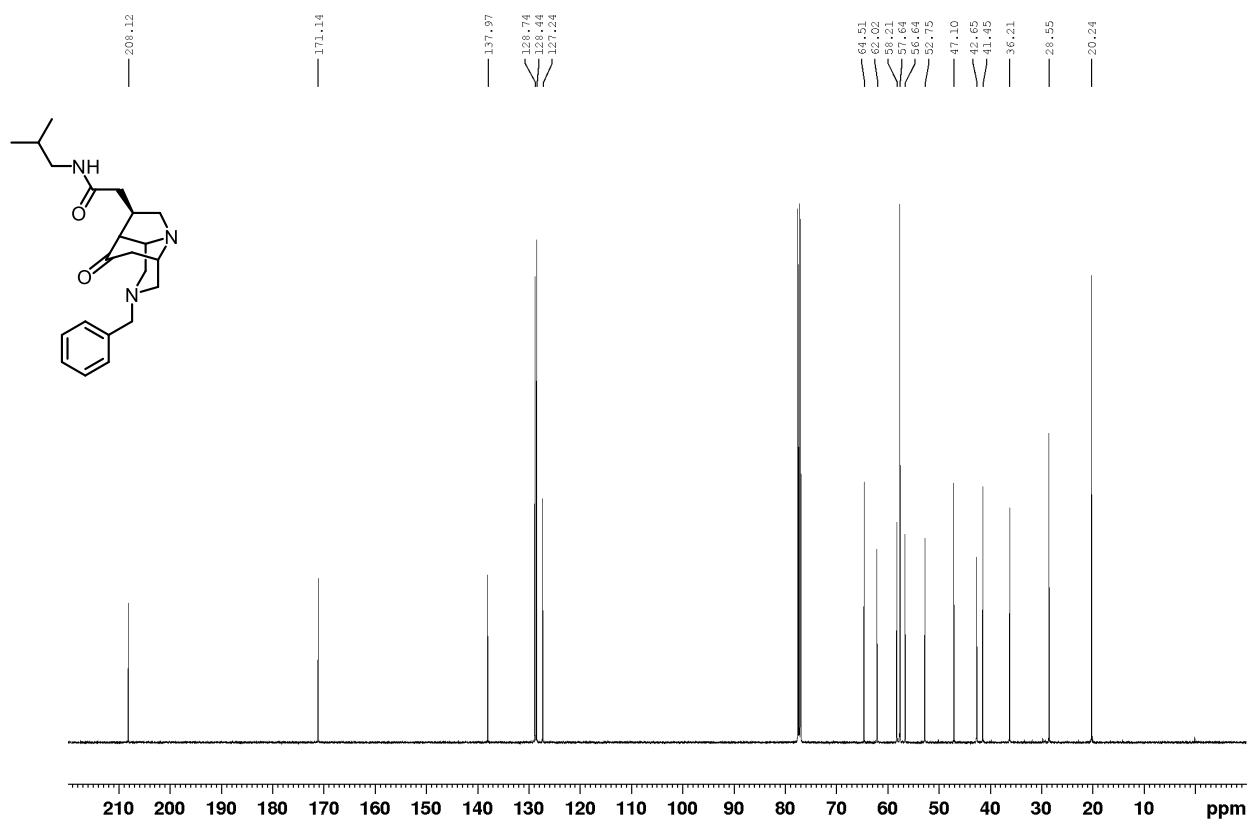

**Alcohol 13a** ( $^1\text{H}$  NMR,  $\text{CDCl}_3$ , 500 MHz)

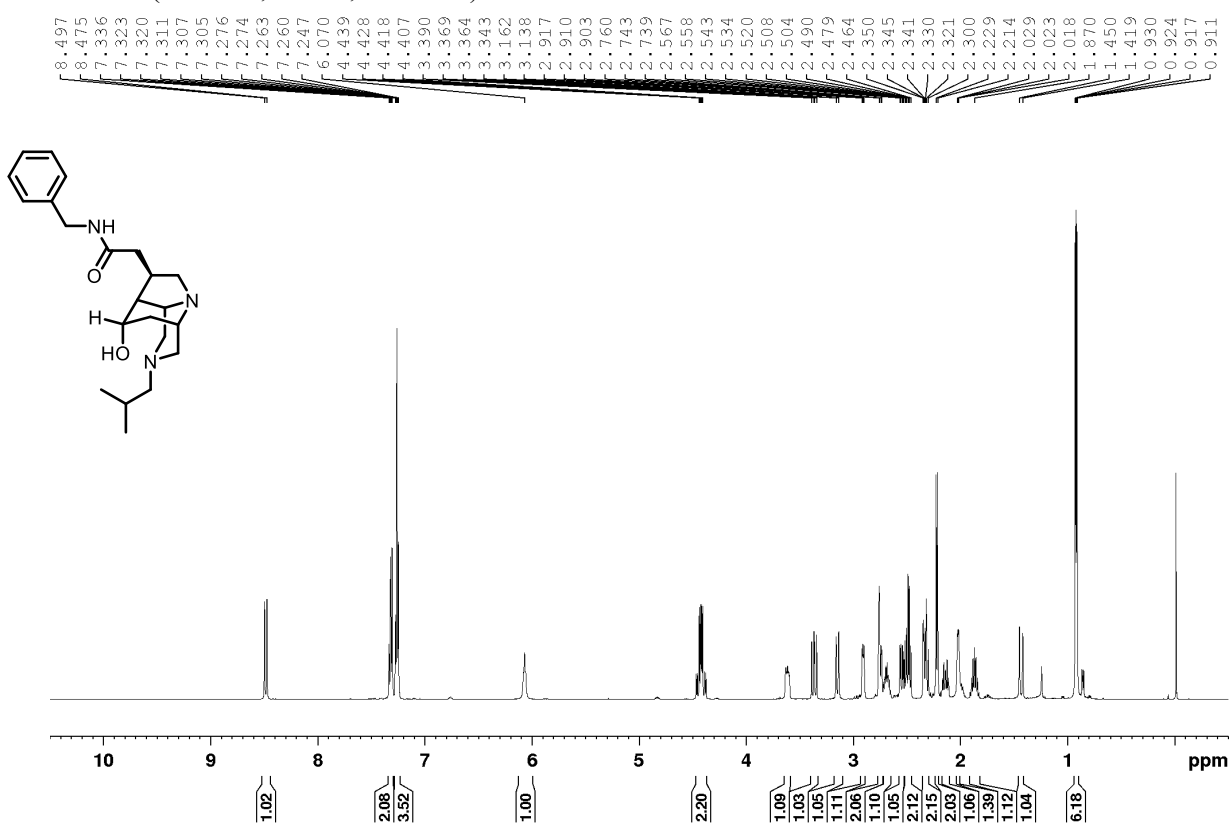

**Alcohol 13a** ( $^{13}\text{C}$  NMR,  $\text{CDCl}_3$ , 125 MHz)

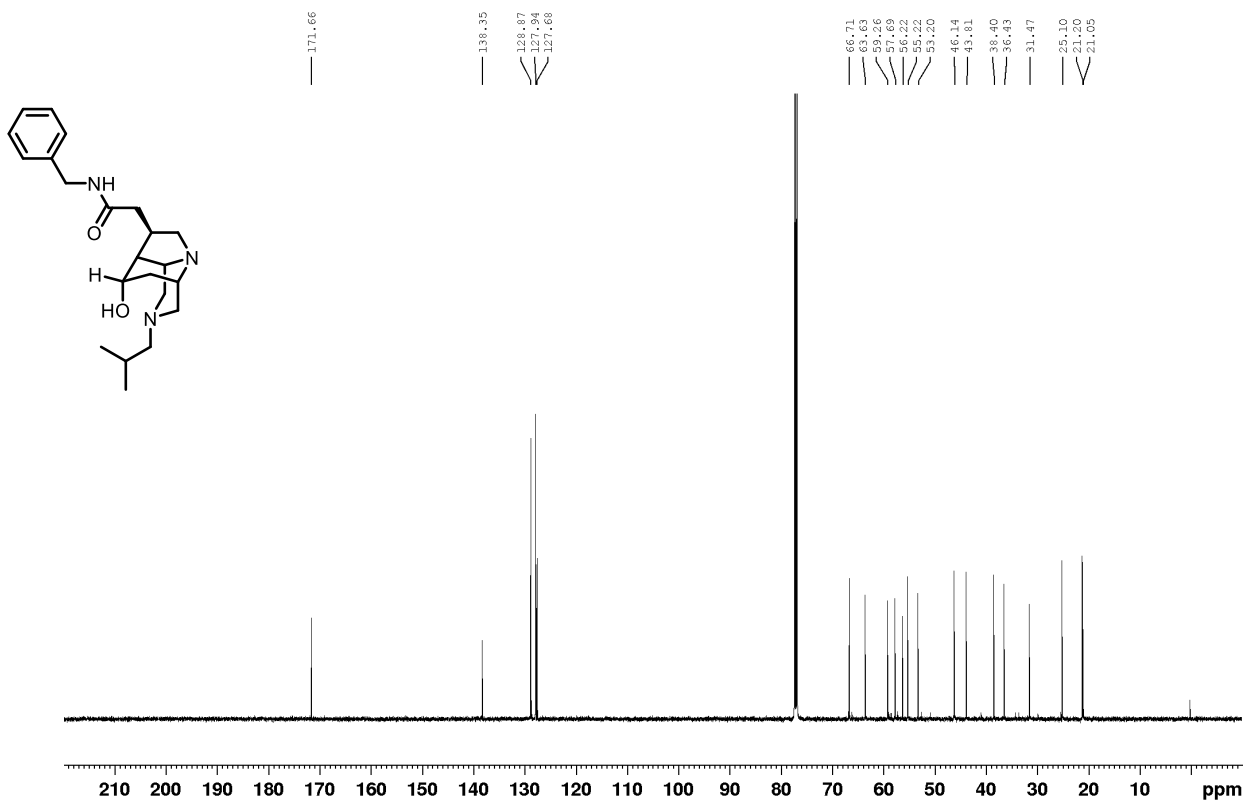

Alcohol 13b ( $^1\text{H}$  NMR,  $\text{CDCl}_3$ , 500 MHz)

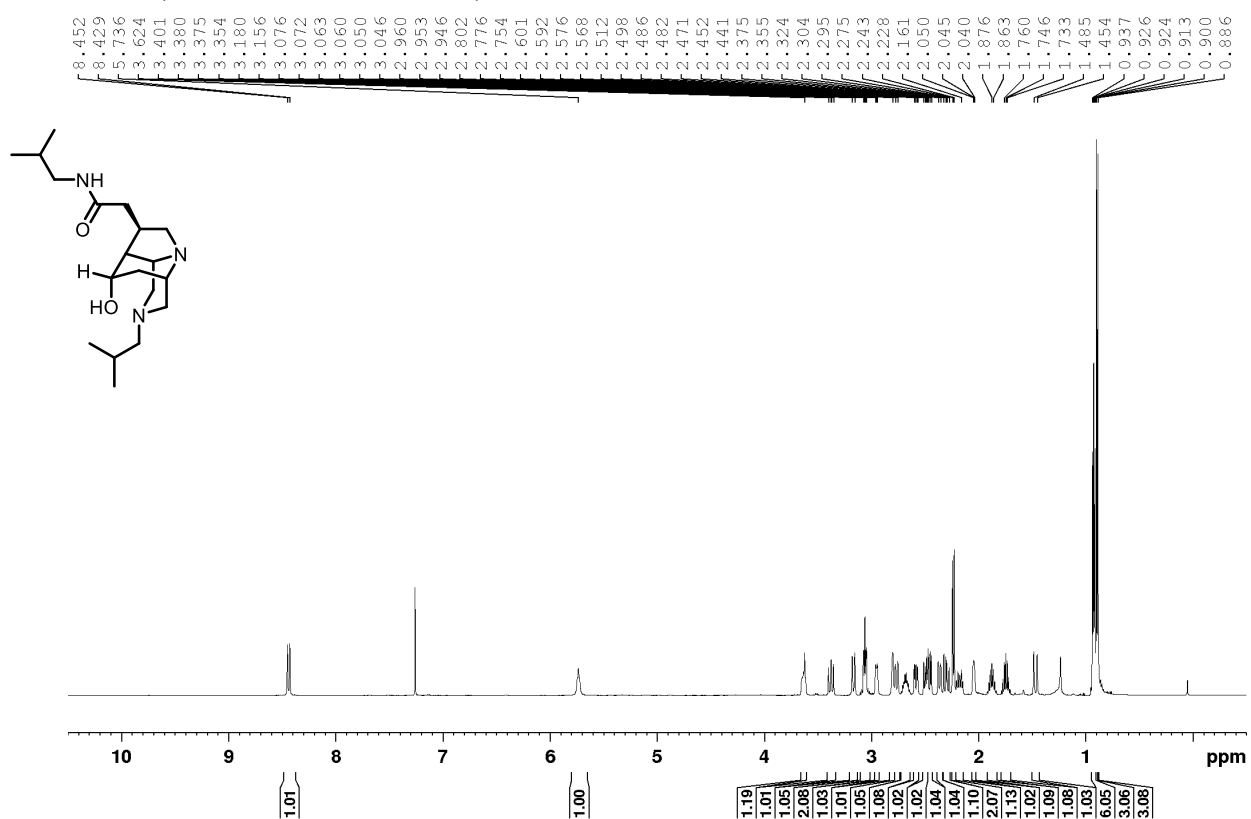

Alcohol 13b ( $^{13}\text{C}$  NMR,  $\text{CDCl}_3$ , 125 MHz)

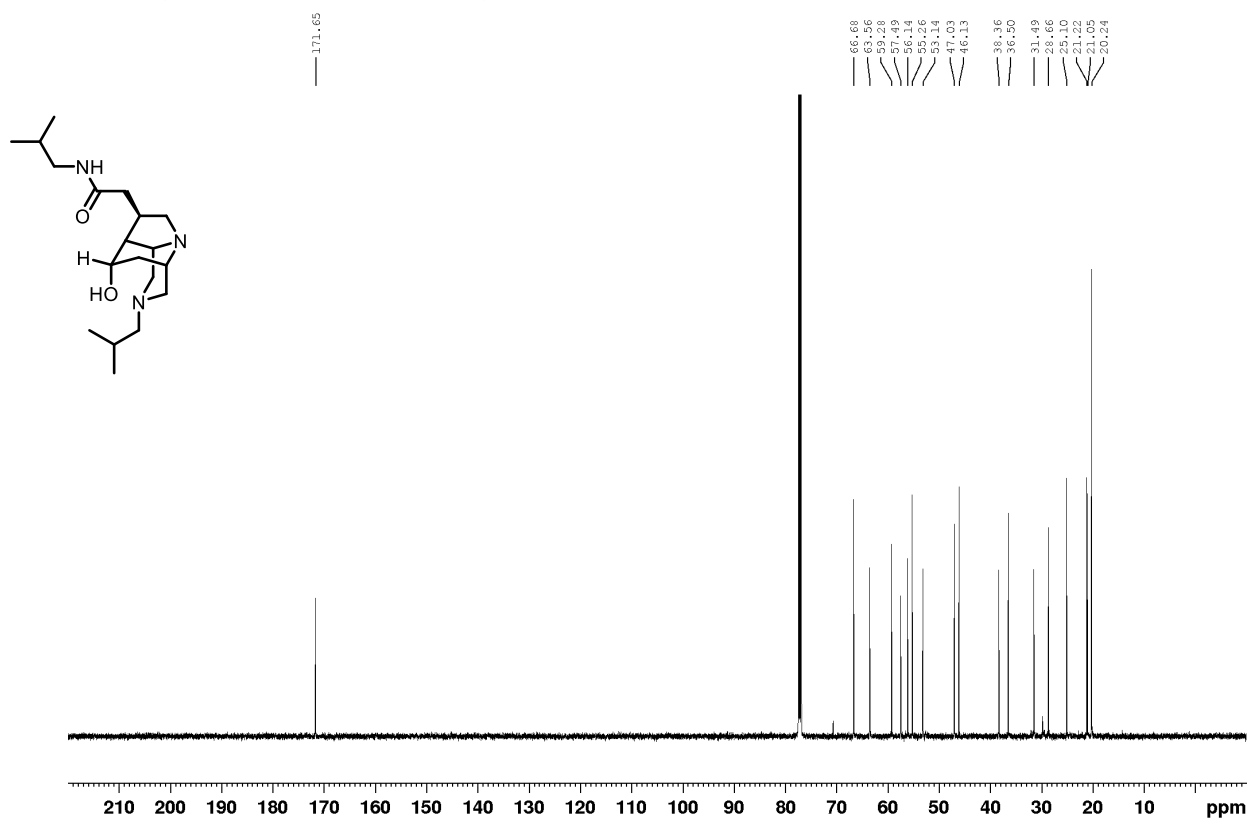

Alcohol 13c (<sup>1</sup>H NMR, CDCl<sub>3</sub>, 400 MHz)

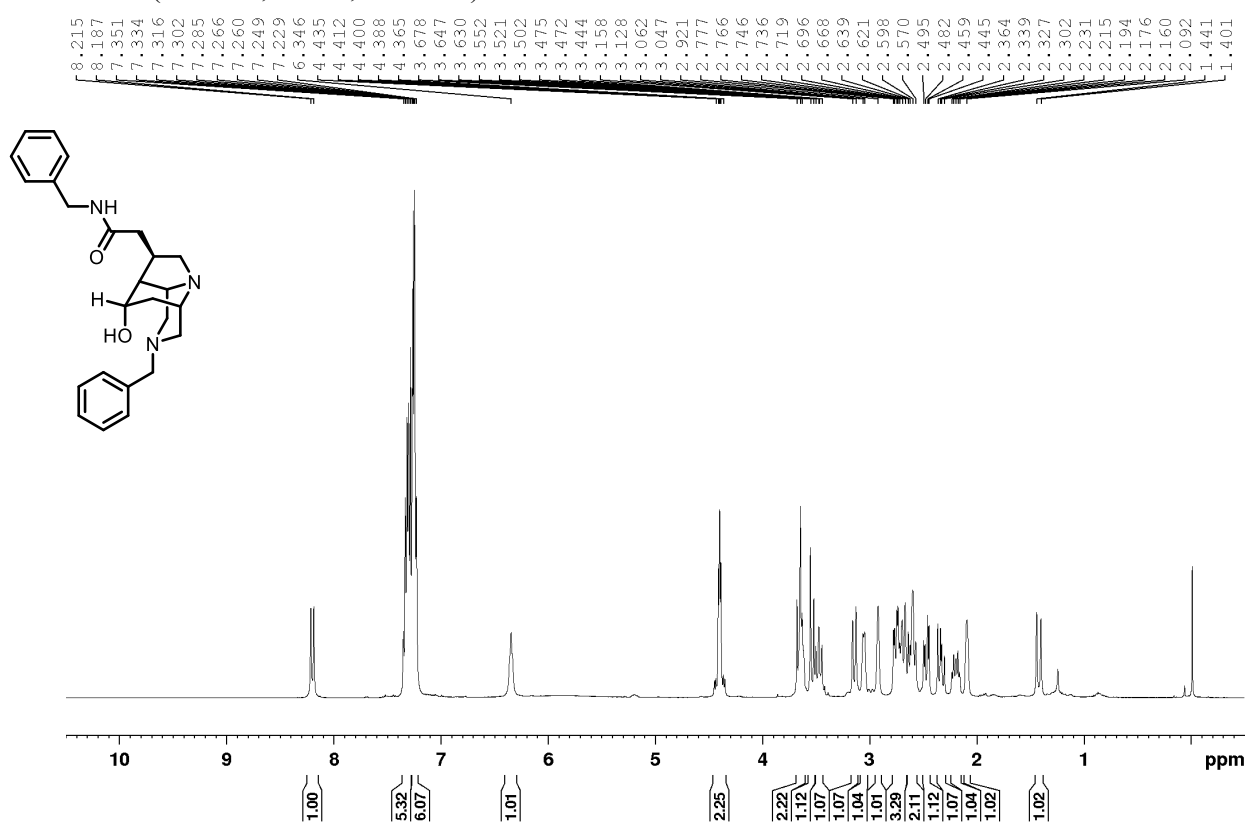

Alcohol 13c (<sup>13</sup>C NMR, CDCl<sub>3</sub>, 125 MHz)

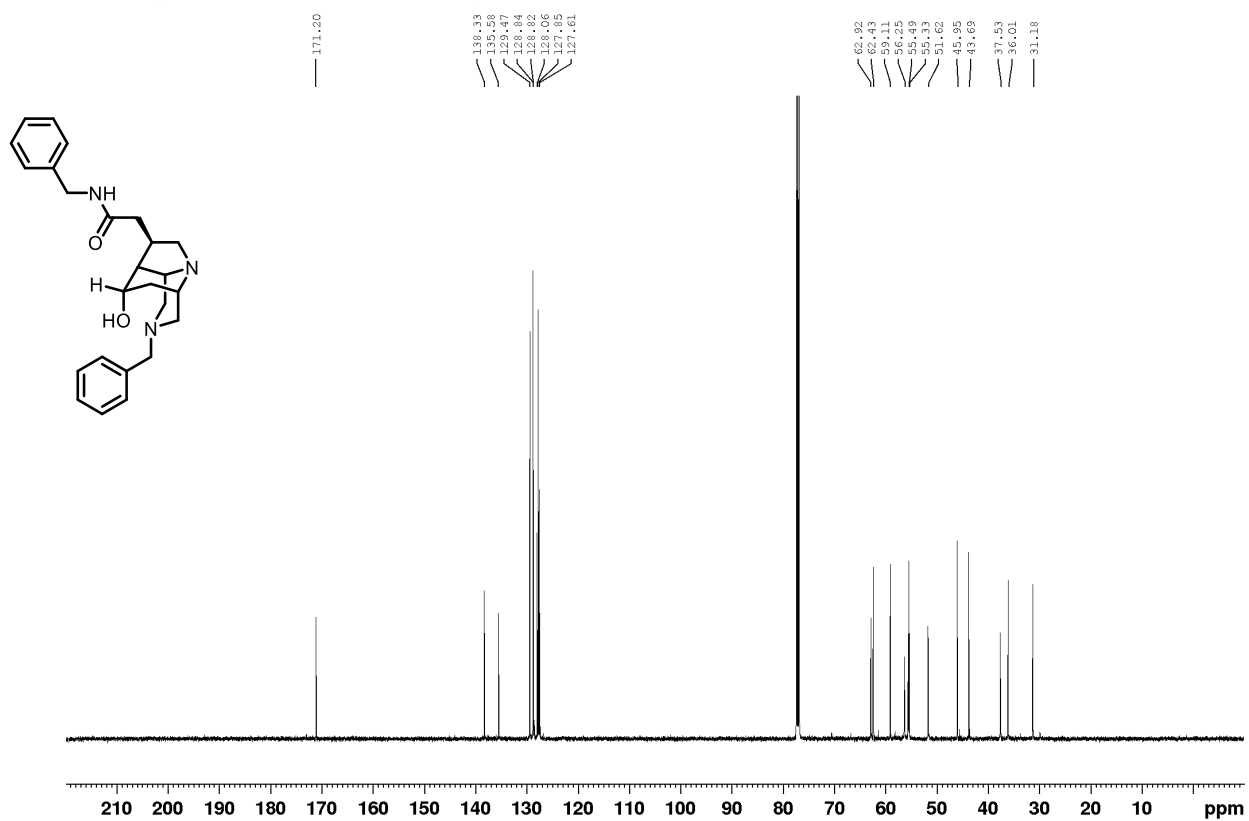

**Alcohol 13d** ( $^1\text{H}$  NMR,  $\text{CDCl}_3$ , 500 MHz)

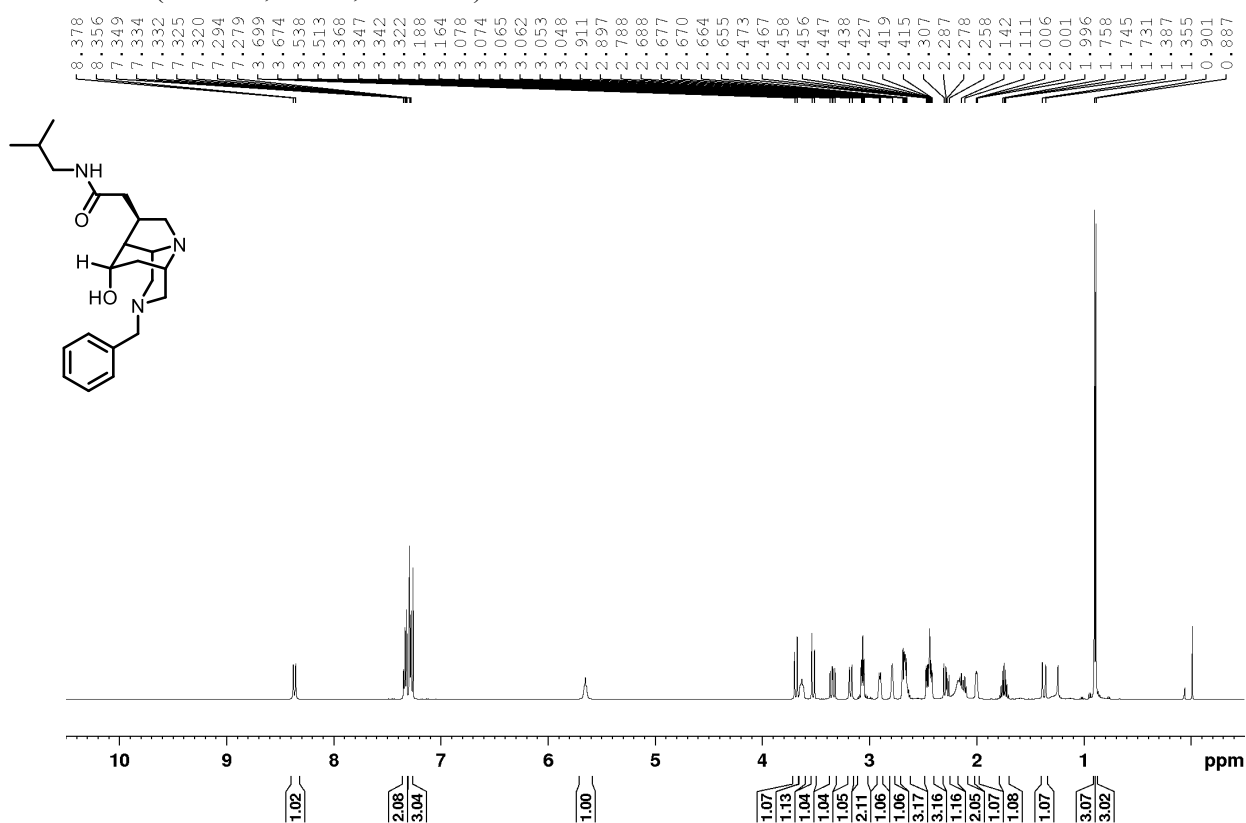

**Alcohol 13d** ( $^{13}\text{C}$  NMR,  $\text{CDCl}_3$ , 125 MHz)

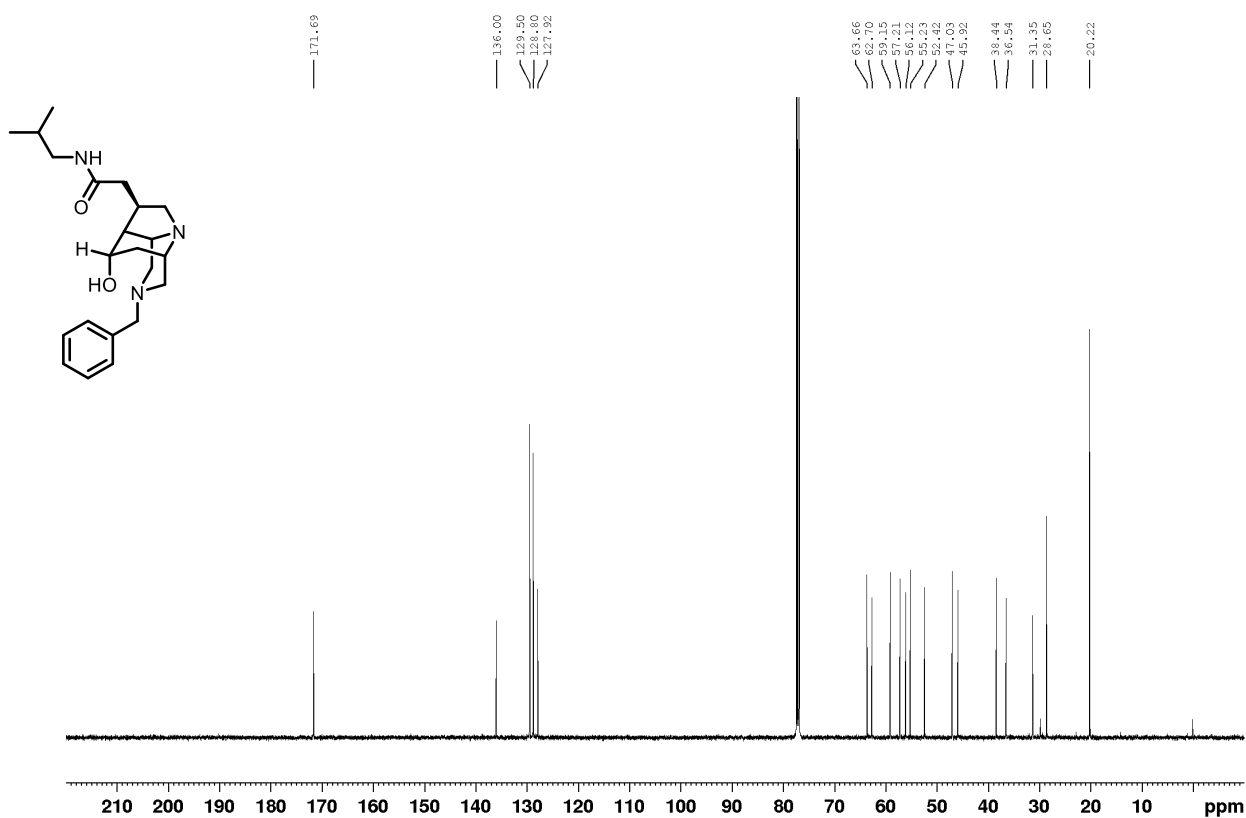

**Ester 6a** ( $^1\text{H}$  NMR,  $\text{CDCl}_3$ , 400 MHz)

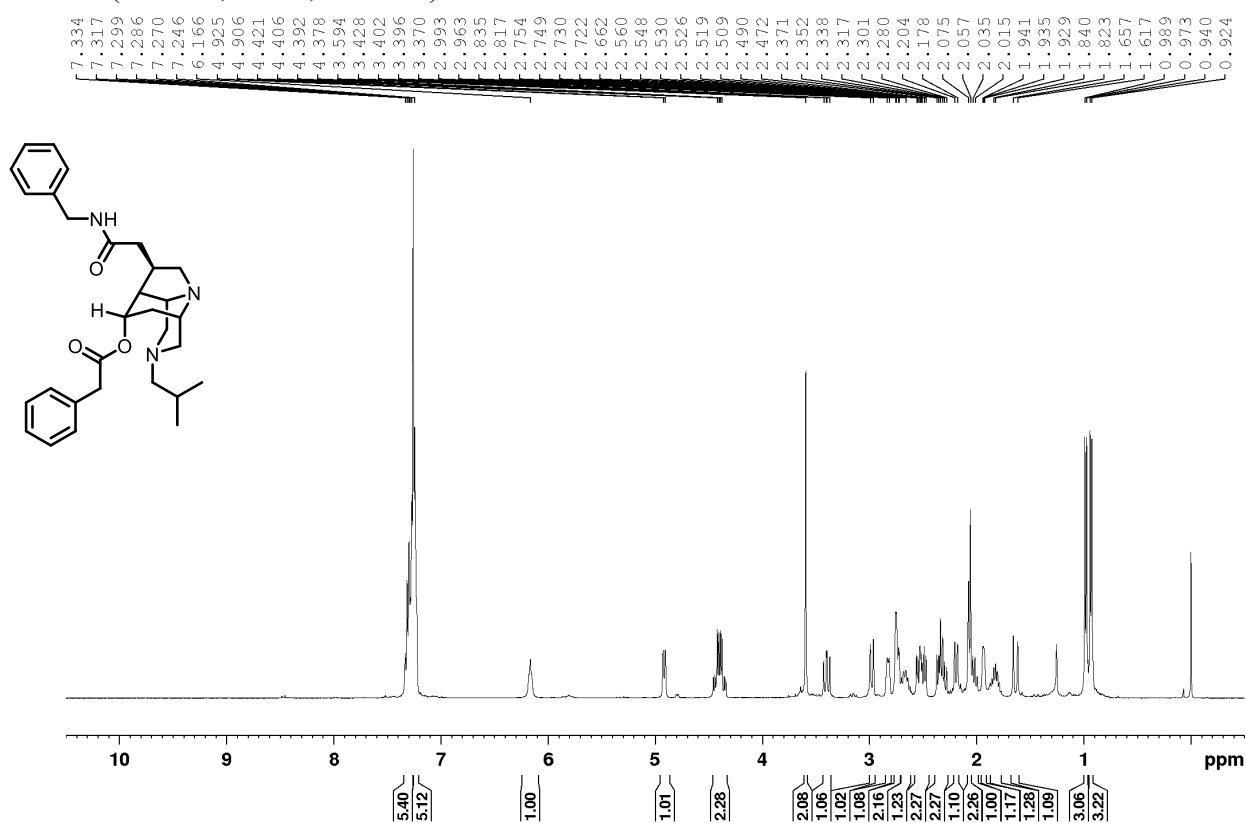

**Ester 6a** ( $^{13}\text{C}$  NMR,  $\text{CDCl}_3$ , 125 MHz)

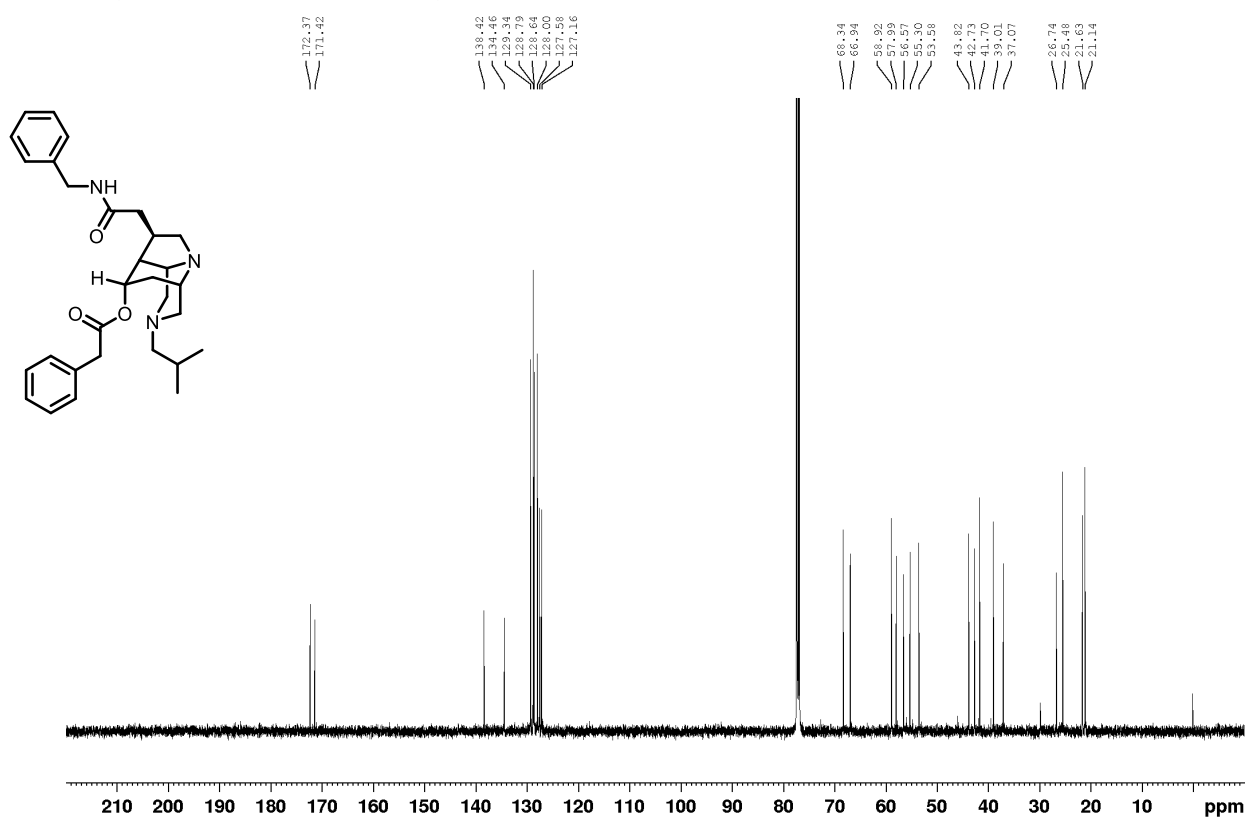



**Ester 6b** ( $^1\text{H}$  NMR,  $\text{CDCl}_3$ , 500 MHz)

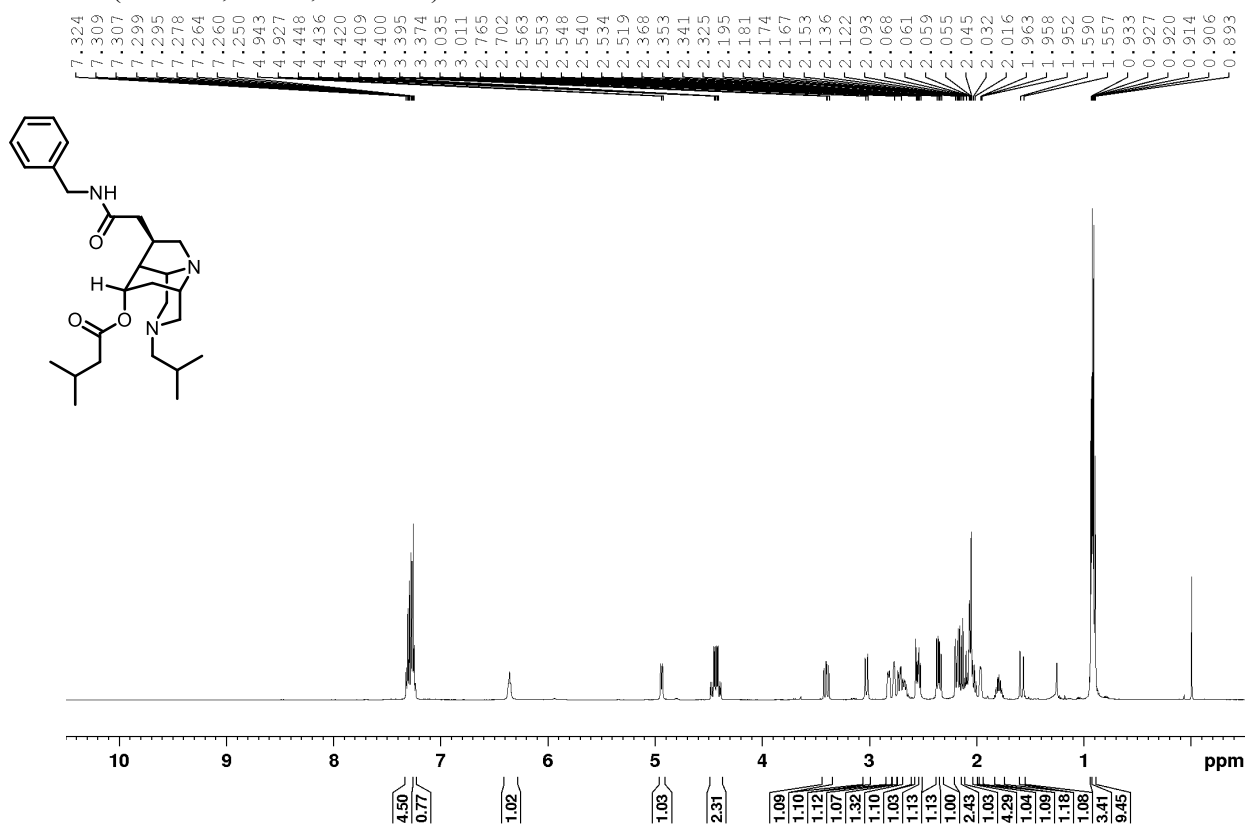

**Ester 6b** ( $^{13}\text{C}$  NMR,  $\text{CDCl}_3$ , 125 MHz)

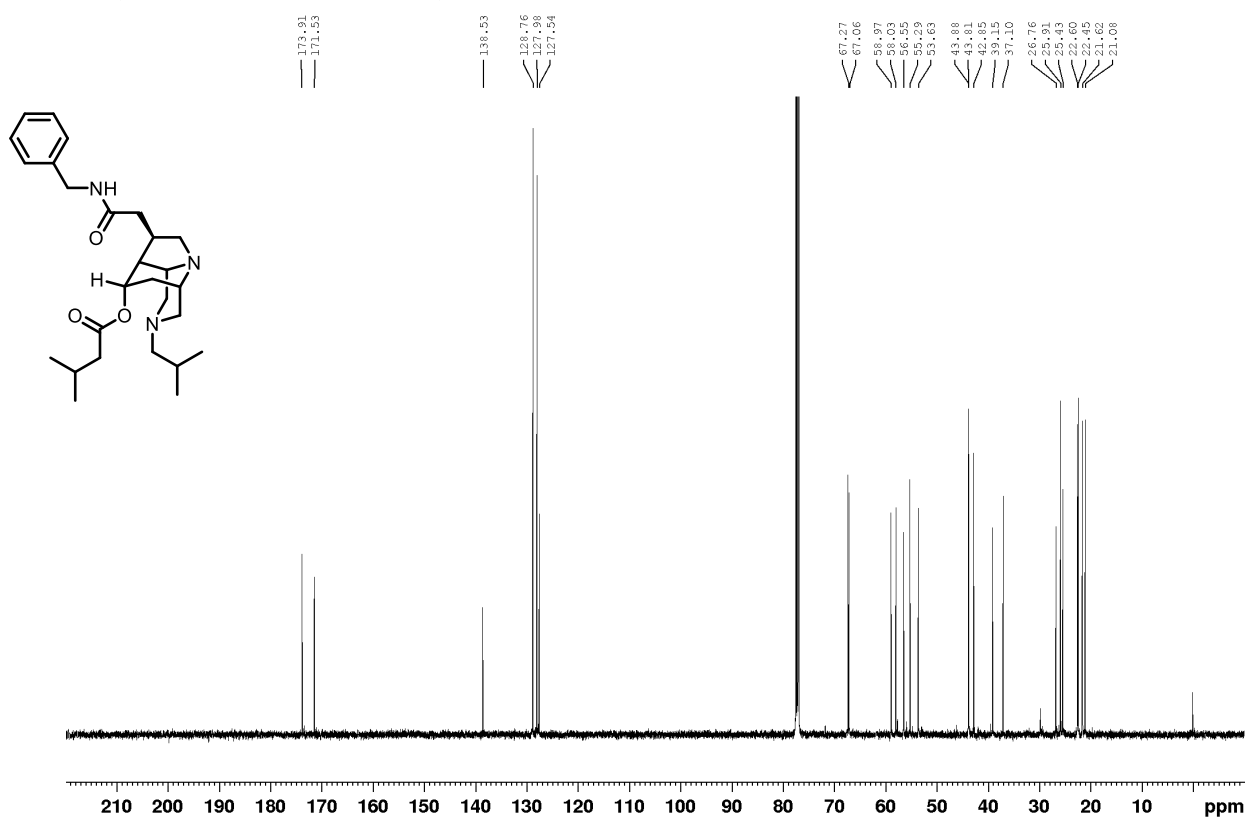

**Ester 6c** ( $^1\text{H}$  NMR,  $\text{CDCl}_3$ , 400 MHz)

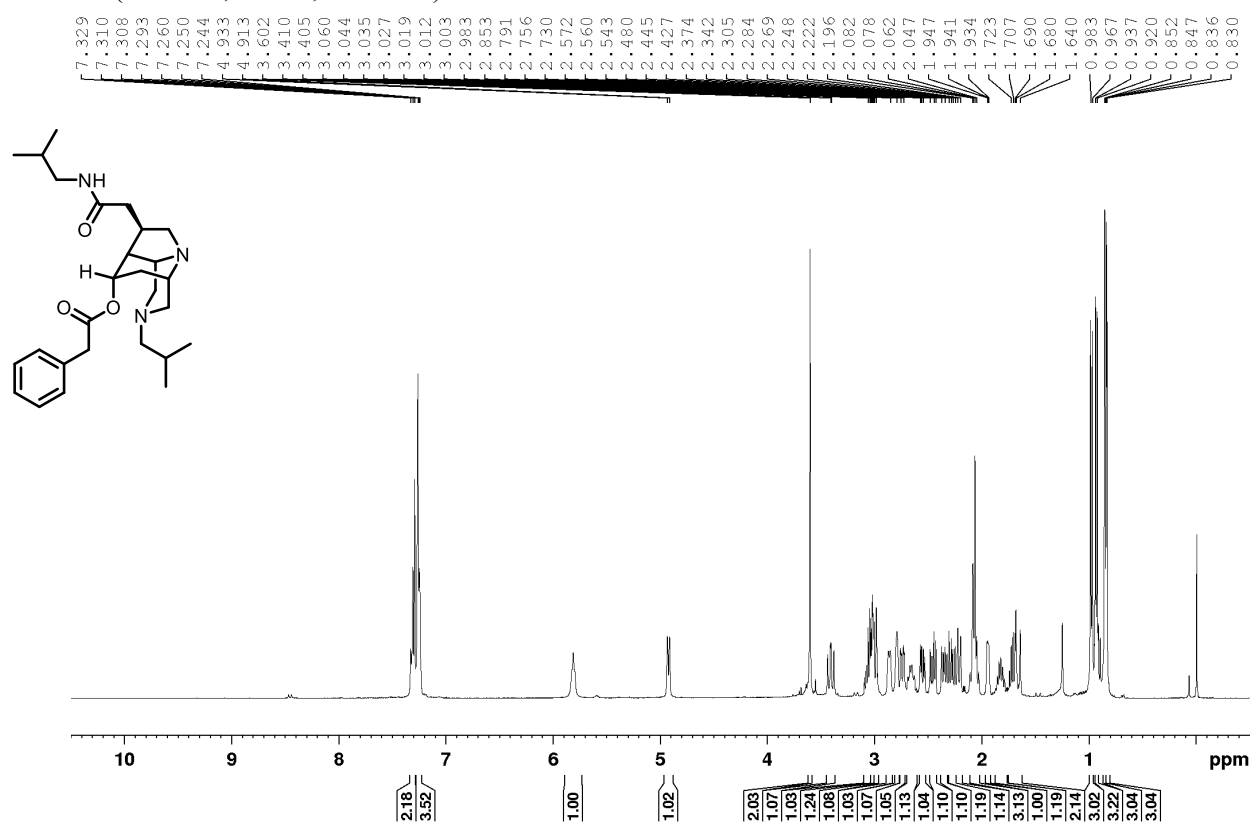

**Ester 6c** ( $^{13}\text{C}$  NMR,  $\text{CDCl}_3$ , 100 MHz)

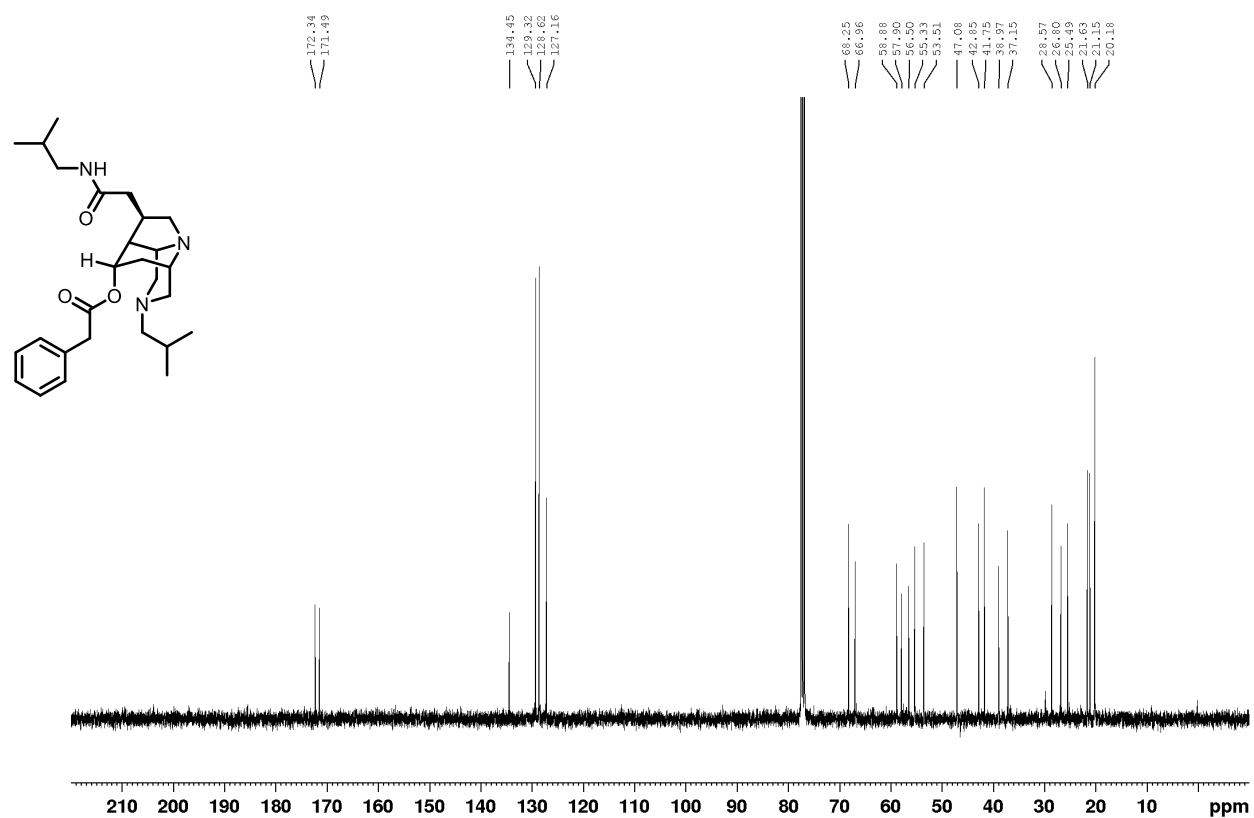

**Ester 6d** ( $^1\text{H}$  NMR,  $\text{CDCl}_3$ , 500 MHz)

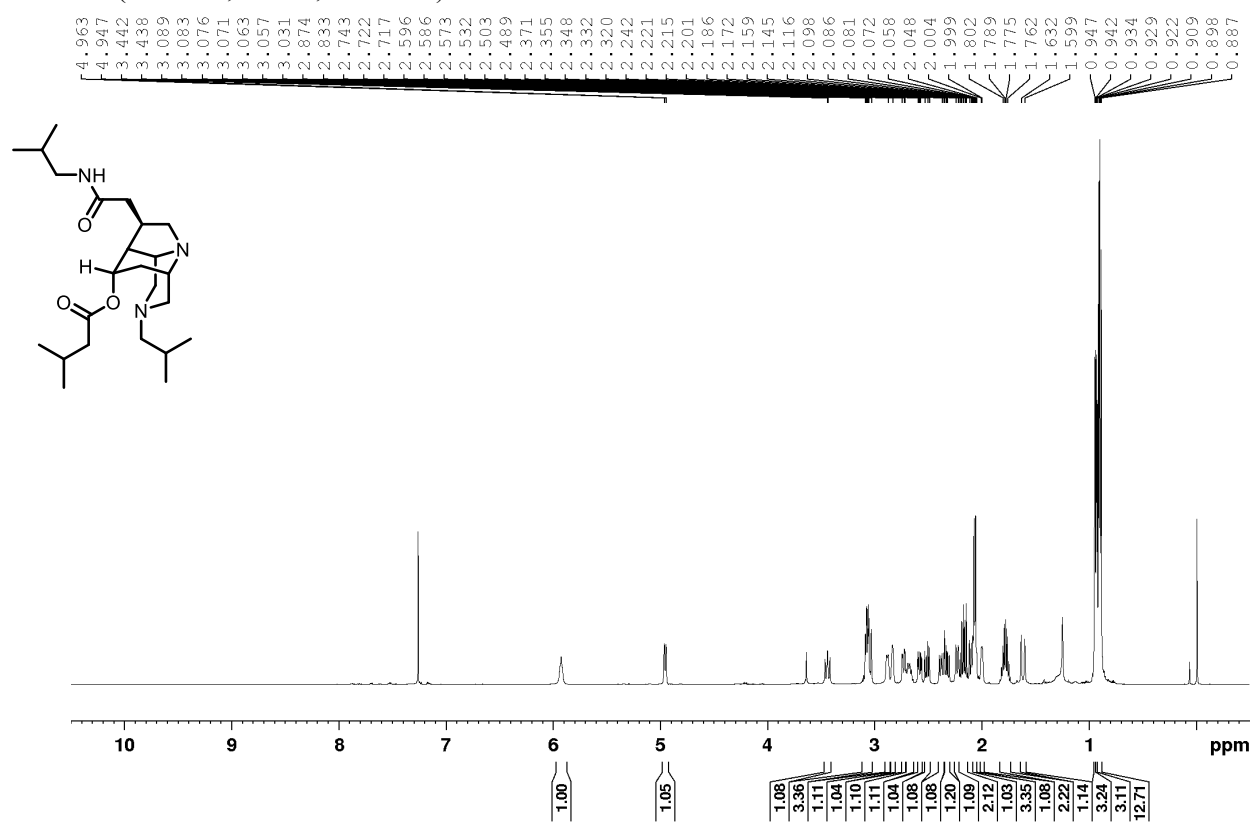

**Ester 6d** ( $^{13}\text{C}$  NMR,  $\text{CDCl}_3$ , 125 MHz)

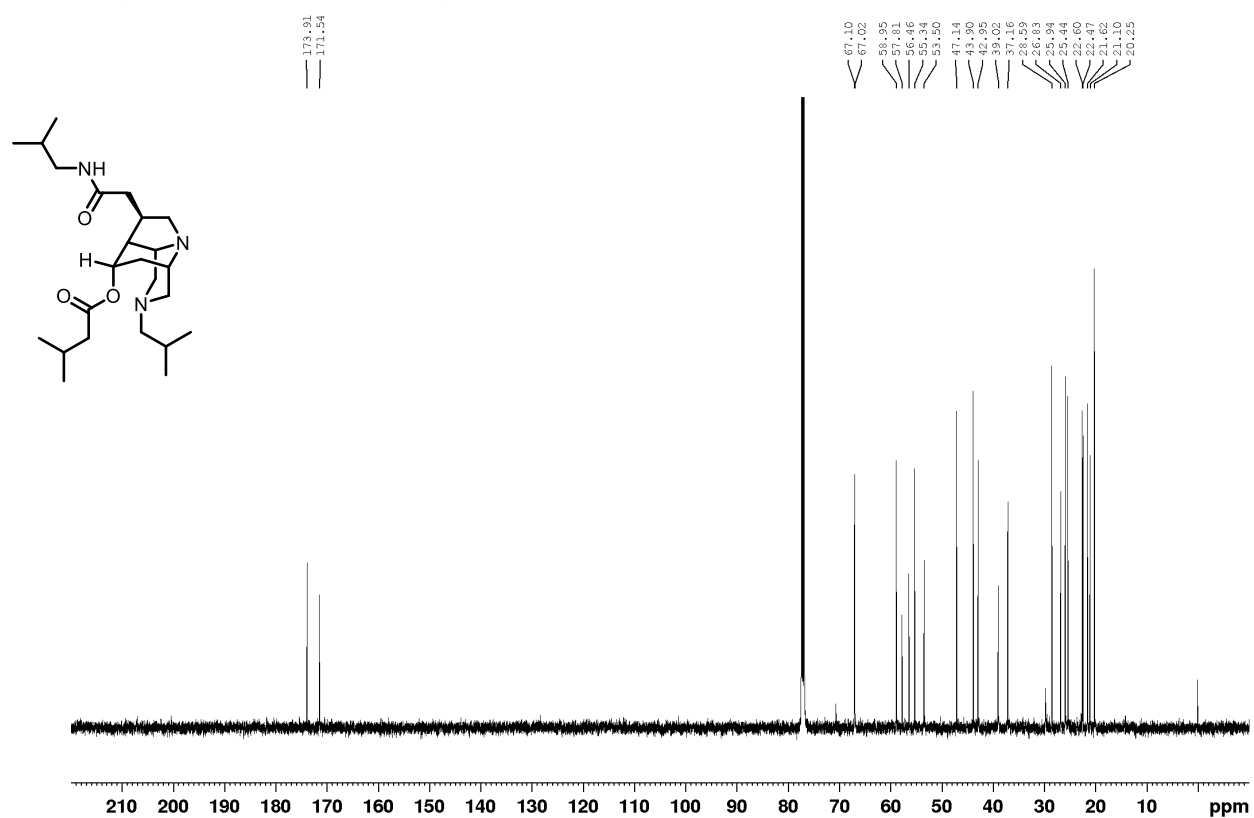

**Ester 6e** ( $^1\text{H}$  NMR,  $\text{CDCl}_3$ , 500 MHz)

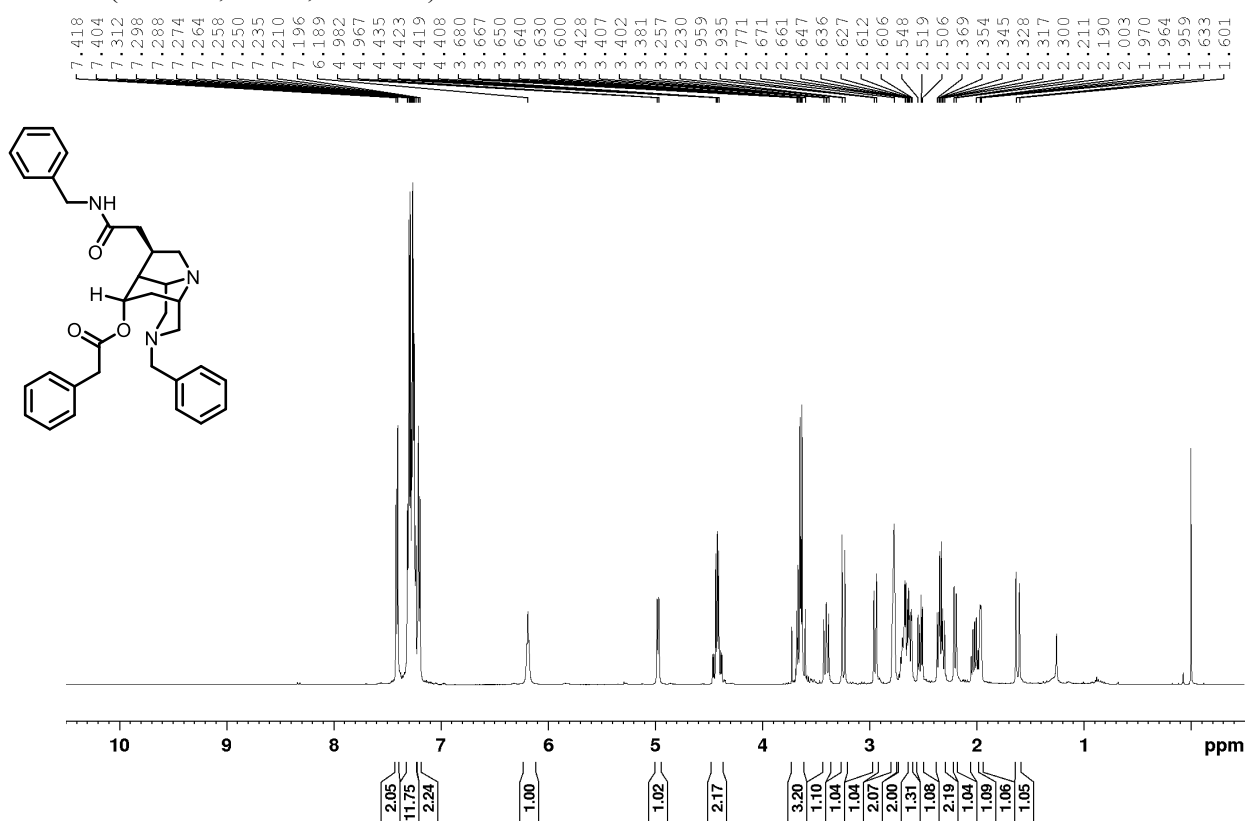

**Ester 6e** ( $^{13}\text{C}$  NMR,  $\text{CDCl}_3$ , 125 MHz)

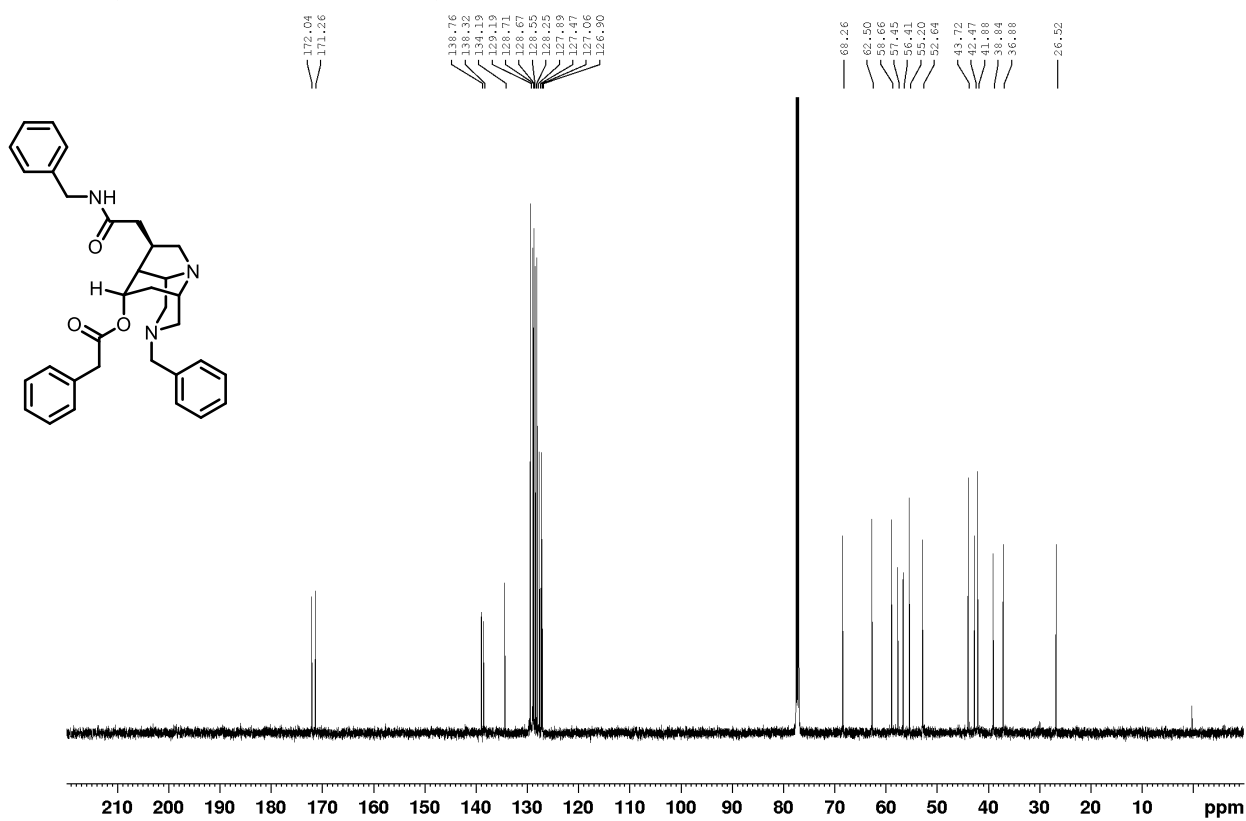

**Ester 6f** ( $^1\text{H}$  NMR,  $\text{CDCl}_3$ , 400 MHz)

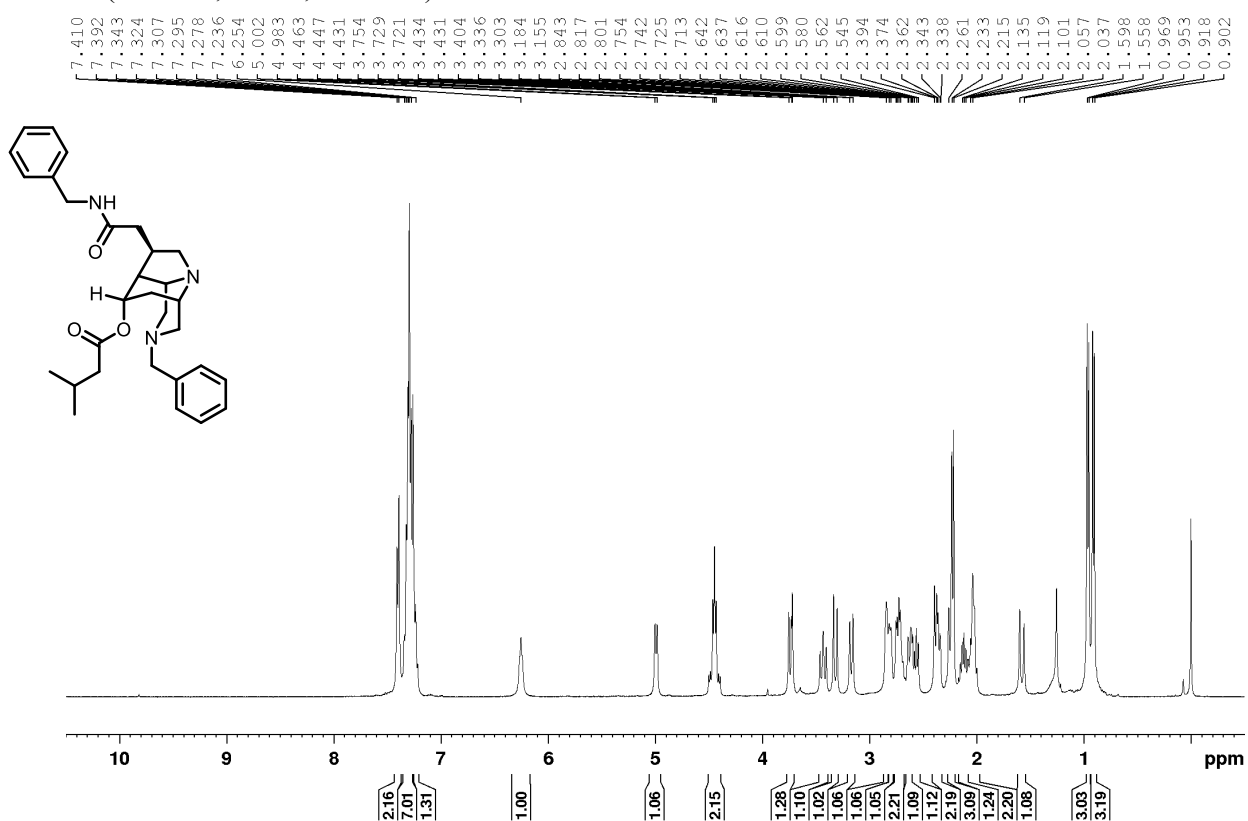

**Ester 6f** ( $^{13}\text{C}$  NMR,  $\text{CDCl}_3$ , 125 MHz)

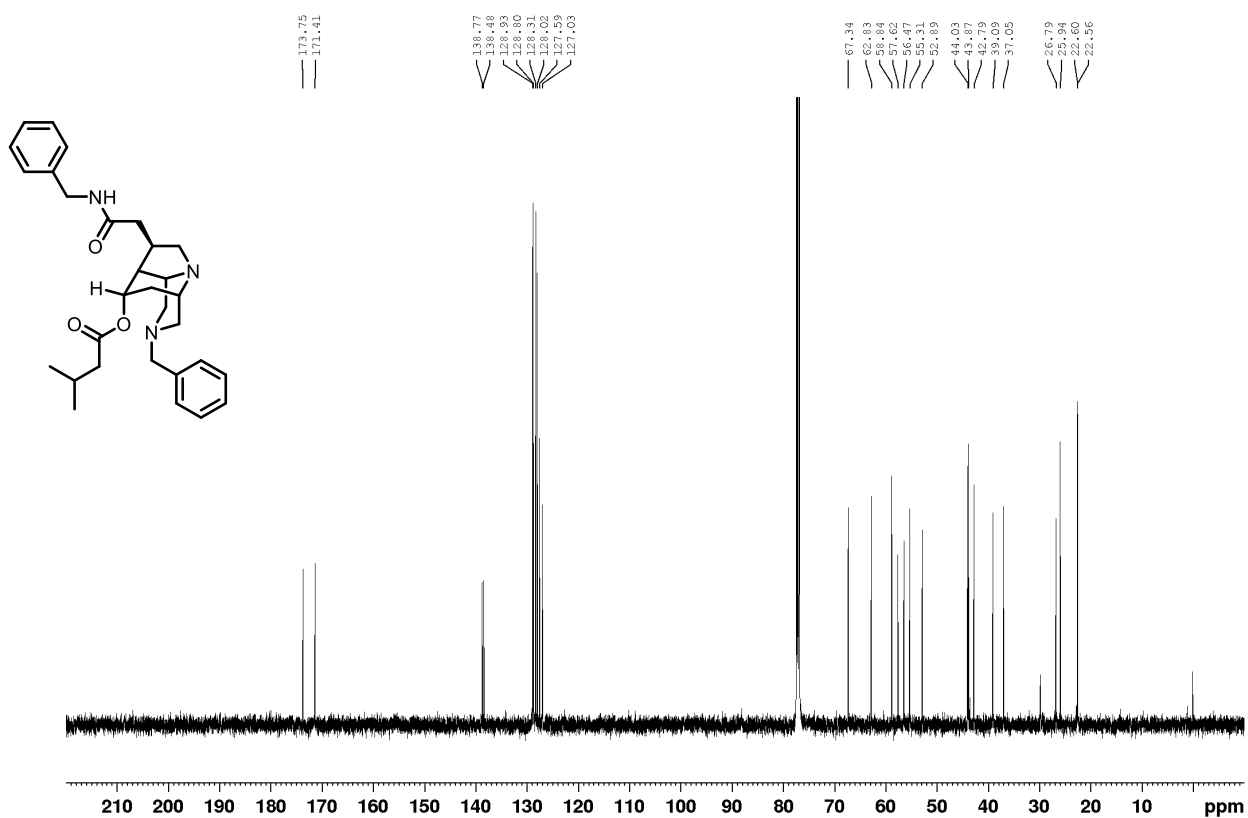

**Ester 6g** ( $^1\text{H}$  NMR,  $\text{CDCl}_3$ , 500 MHz)

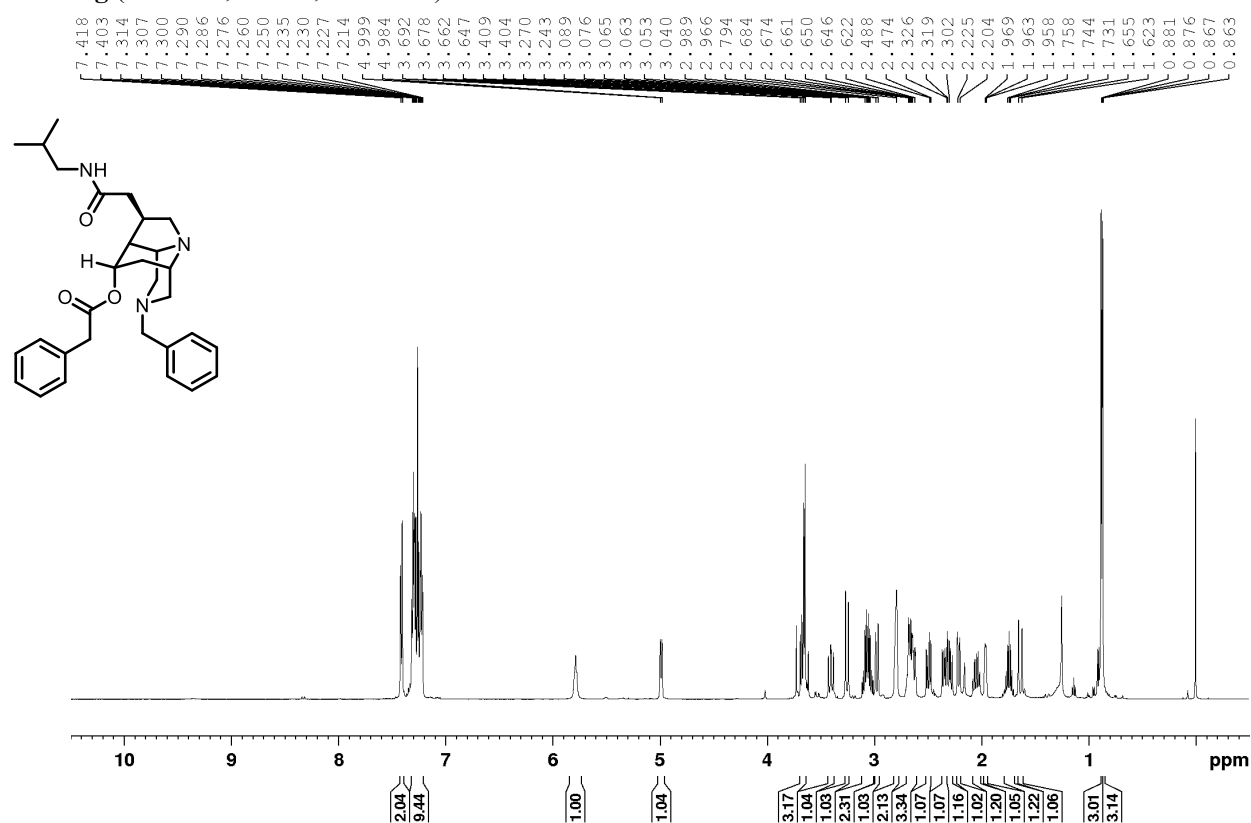

**Ester 6g** ( $^{13}\text{C}$  NMR,  $\text{CDCl}_3$ , 125 MHz)

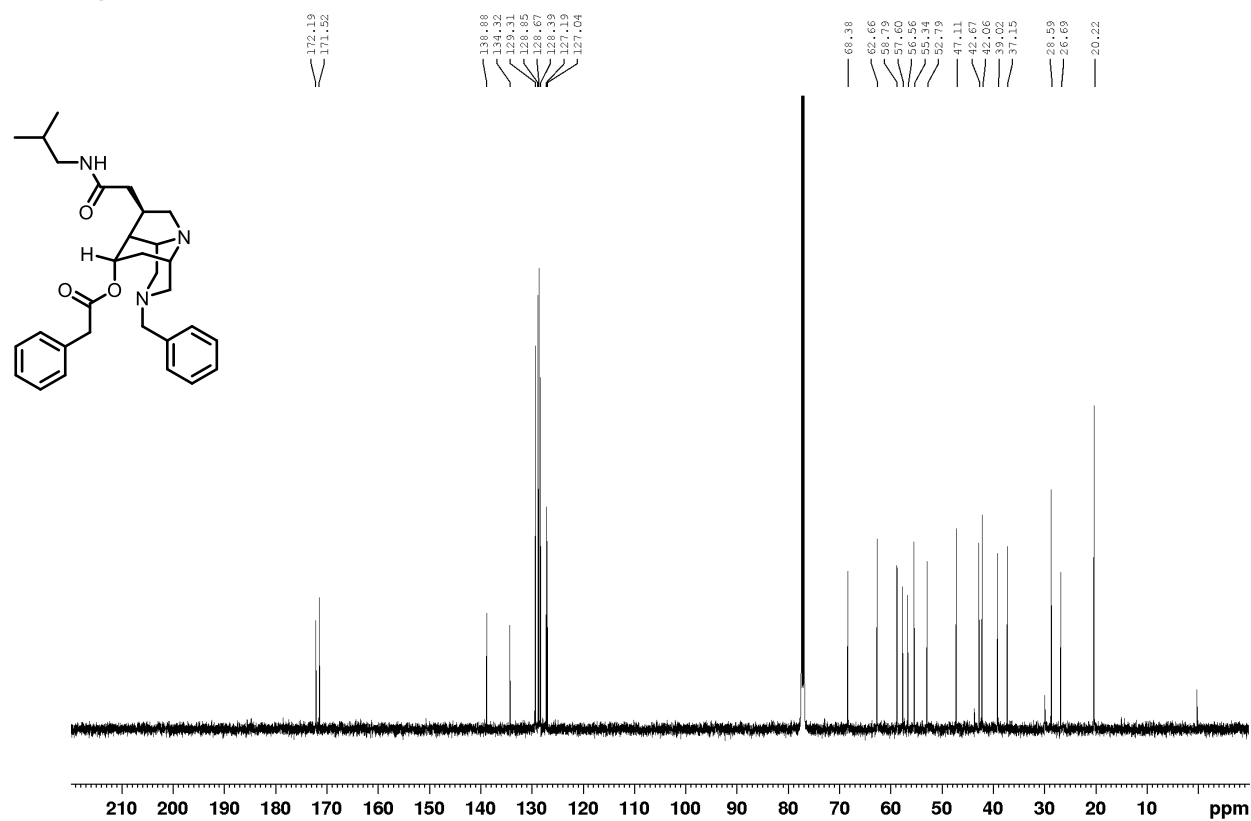

**Ester 6h** ( $^1\text{H}$  NMR,  $\text{CDCl}_3$ , 500 MHz)

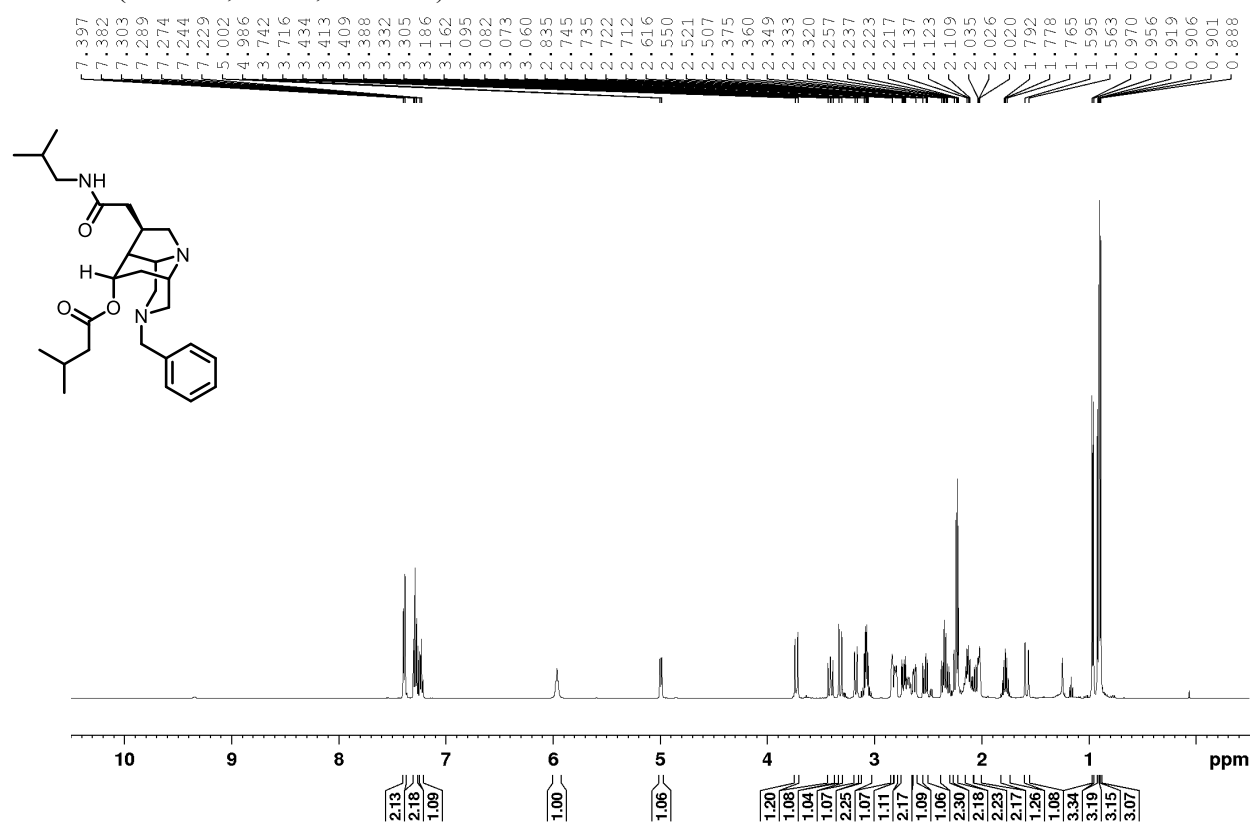

**Ester 6h** ( $^{13}\text{C}$  NMR,  $\text{CDCl}_3$ , 125 MHz)

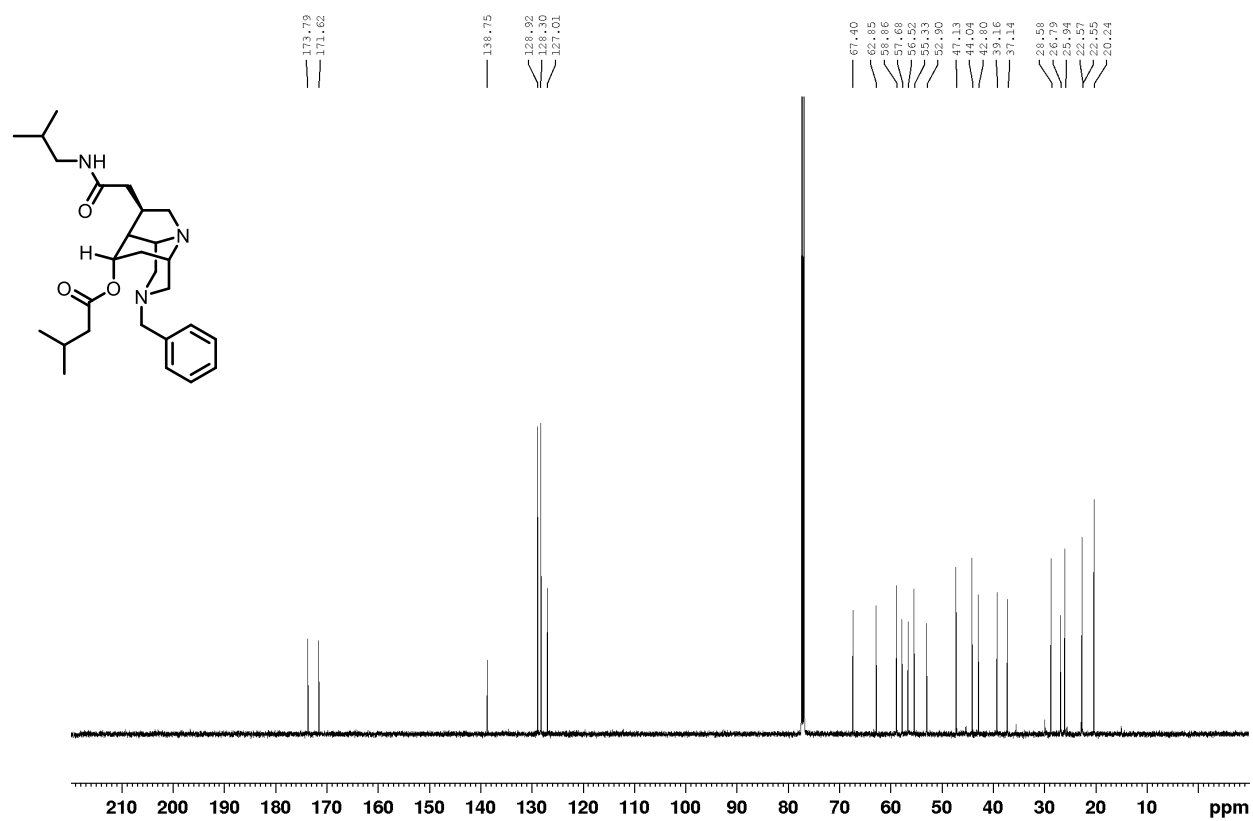

Supplement: d3ob01534c1.pdf [file d3ob01534c1.pdf]
